# Supplementary material for: Rational design of nickel–borane complexes for methane activation and functionalization
Source: Royal Society of Chemistry journal article supplement (doi:10.1039/d2me00007e), 2022-01-01
Supplement: d2me00007e1.pdf [file d2me00007e1.pdf]

**1<sup>Ni-B</sup>**

|    |             |             |             |
|----|-------------|-------------|-------------|
| Ni | -0.04177100 | -0.91207400 | -0.45084200 |
| C  | -0.71764800 | -2.27272100 | 0.91782200  |
| B  | 0.07051600  | -1.17146800 | 1.69221800  |
| P  | 1.98054700  | -0.15195300 | -0.30874600 |
| P  | -1.55818000 | 0.64587700  | -0.21254100 |
| C  | -2.14179100 | -2.47741600 | 0.97823300  |
| C  | -2.80686800 | -3.04419100 | -0.09133500 |
| H  | -3.88491800 | -3.18518100 | -0.04024500 |
| C  | -2.12804500 | -3.36296200 | -1.29013500 |
| C  | -2.89862200 | -3.85493900 | -2.48216400 |
| H  | -3.39777000 | -4.80705300 | -2.25917500 |
| H  | -3.68419800 | -3.14529800 | -2.76528900 |
| H  | -2.24568000 | -4.01032100 | -3.34713600 |
| C  | -0.74209000 | -3.30094300 | -1.30802200 |
| H  | -0.20865100 | -3.68650100 | -2.17791000 |
| C  | 0.02200400  | -2.91497400 | -0.16510100 |
| C  | 1.35747000  | -3.60885800 | -0.00706500 |
| H  | 1.95159700  | -3.55013100 | -0.92560800 |
| H  | 1.95653500  | -3.22003600 | 0.81205700  |
| H  | 1.17474400  | -4.67443500 | 0.19481000  |
| C  | -2.90738500 | -2.11524800 | 2.22042800  |
| H  | -2.42666700 | -2.53240500 | 3.11301300  |
| H  | -2.95481200 | -1.03266600 | 2.36751600  |
| H  | -3.93422000 | -2.49118600 | 2.16671900  |
| C  | 1.59814500  | -1.32896400 | 2.11681100  |
| C  | 2.61309900  | -0.86635300 | 1.25710600  |
| C  | 2.27122700  | 1.63567000  | -0.02074500 |
| C  | 2.48409700  | 2.51176000  | -1.09286000 |
| H  | 2.51376600  | 2.12718100  | -2.10928300 |
| C  | 2.37322700  | 3.52075700  | 1.50314400  |
| H  | 2.31874700  | 3.90912900  | 2.51722900  |
| C  | 2.20701400  | 2.15408900  | 1.27968500  |
| H  | 2.02648400  | 1.48923700  | 2.11930900  |
| C  | 3.96342900  | -0.99094300 | 1.59196600  |
| H  | 4.73371200  | -0.64584500 | 0.90833200  |
| C  | 4.32808600  | -1.58089500 | 2.80153300  |
| H  | 5.37861400  | -1.68843800 | 3.06024000  |
| C  | 3.33715700  | -2.04215600 | 3.67156100  |
| H  | 3.61633600  | -2.51527200 | 4.61037600  |
| C  | 1.99006700  | -1.91295000 | 3.33105400  |
| H  | 1.23290200  | -2.30684500 | 4.00691900  |
| C  | -0.65828300 | 0.08952800  | 2.34775200  |
| C  | -0.50451000 | 0.38546000  | 3.71287600  |

|   |             |             |             |
|---|-------------|-------------|-------------|
| H | 0.11368800  | -0.26182100 | 4.32976500  |
| C | -1.11762600 | 1.48926400  | 4.30255400  |
| H | -0.98274900 | 1.68141700  | 5.36467100  |
| C | -1.88889600 | 2.35807600  | 3.52735200  |
| H | -2.35995500 | 3.22882900  | 3.97669300  |
| C | -2.03419700 | 2.10973600  | 2.16474400  |
| H | -2.60154900 | 2.80243100  | 1.54786300  |
| C | -1.52121300 | 2.32135100  | -0.97901200 |
| C | -2.26849400 | 2.60397100  | -2.13178200 |
| H | -2.92796700 | 1.85140600  | -2.55292500 |
| C | -3.31136600 | 0.18610600  | -0.51248600 |
| C | -4.33753700 | 0.41102900  | 0.40932600  |
| H | -4.11542900 | 0.86681500  | 1.36924300  |
| C | -5.64951800 | 0.04002700  | 0.11270700  |
| H | -6.43484200 | 0.20934000  | 0.84541900  |
| C | -5.95475200 | -0.53801700 | -1.11968700 |
| H | -6.97868500 | -0.81787900 | -1.35405200 |
| C | -4.93641500 | -0.76101300 | -2.04826800 |
| H | -5.16561400 | -1.21373300 | -3.00981800 |
| C | -3.62227900 | -0.42052400 | -1.73674300 |
| H | -2.82354900 | -0.64157200 | -2.44155900 |
| C | -1.43307700 | 0.98837900  | 1.57946600  |
| C | 2.61542100  | 4.38315600  | 0.43272500  |
| C | 2.66765700  | 3.87364000  | -0.86604800 |
| H | 2.75476500  | 5.44689400  | 0.60839600  |
| H | 2.83789800  | 4.54060200  | -1.70740300 |
| C | -0.69274100 | 3.32177000  | -0.45466200 |
| C | -2.19493600 | 3.85661300  | -2.73944500 |
| C | -1.38149900 | 4.85314300  | -2.19805800 |
| C | -0.63370200 | 4.57890000  | -1.05315500 |
| H | -0.09616700 | 3.12568900  | 0.42981400  |
| H | 0.00792500  | 5.34179000  | -0.62159600 |
| H | -1.33208900 | 5.83424700  | -2.66379500 |
| H | -2.78591400 | 4.05603400  | -3.63020400 |
| C | 5.40918500  | -0.33974100 | -2.63266700 |
| C | 4.50619900  | 0.02939500  | -1.63745900 |
| C | 3.22776600  | -0.54410100 | -1.59251200 |
| C | 2.86235500  | -1.46881000 | -2.57814600 |
| C | 3.76475100  | -1.83934400 | -3.57536000 |
| C | 5.04207100  | -1.27860400 | -3.60020800 |
| H | 6.39914200  | 0.10909500  | -2.65694100 |
| H | 4.78964900  | 0.78106100  | -0.90550700 |
| H | 1.85915600  | -1.88933100 | -2.56078900 |
| H | 3.46831900  | -2.55859500 | -4.33470300 |

|                         |             |             |             |
|-------------------------|-------------|-------------|-------------|
| H                       | 5.74733700  | -1.56301600 | -4.37696300 |
| <b>2<sup>Ni-B</sup></b> |             |             |             |
| Ni                      | 0.27643700  | -0.10273000 | -0.83544200 |
| P                       | 2.25982100  | -0.53652600 | -0.19725100 |
| P                       | -1.33257700 | 1.18260000  | -0.24471500 |
| C                       | 3.61116100  | -0.95542300 | -1.35756500 |
| C                       | 3.27557500  | -1.58079200 | -2.56453700 |
| C                       | 4.95932900  | -0.71132500 | -1.06481800 |
| C                       | 4.27057600  | -1.96506300 | -3.46271000 |
| H                       | 2.23017500  | -1.76465500 | -2.79836100 |
| C                       | 5.95434700  | -1.09244600 | -1.96407500 |
| H                       | 5.22982200  | -0.21386700 | -0.13696300 |
| C                       | 5.61192000  | -1.72051300 | -3.16359200 |
| H                       | 3.99863300  | -2.44929100 | -4.39722400 |
| H                       | 6.99787300  | -0.89834400 | -1.72882900 |
| H                       | 6.38868700  | -2.01447100 | -3.86485400 |
| C                       | 2.19333200  | -1.91121500 | 0.98598300  |
| C                       | 3.28501600  | -2.66738600 | 1.42151100  |
| C                       | 0.87160900  | -2.21357900 | 1.35828800  |
| C                       | 3.06506500  | -3.76150900 | 2.25749700  |
| H                       | 4.29319300  | -2.41973900 | 1.09718600  |
| C                       | 0.67878000  | -3.32856200 | 2.18819900  |
| C                       | 1.75899700  | -4.09276500 | 2.63402200  |
| H                       | 3.90307600  | -4.36343400 | 2.60042800  |
| H                       | -0.33358600 | -3.60462900 | 2.47892200  |
| H                       | 1.58506800  | -4.95733200 | 3.27134900  |
| C                       | 2.89474500  | 0.93486100  | 0.67725800  |
| C                       | 2.73007200  | 1.06621600  | 2.05979700  |
| C                       | 3.37913200  | 2.02357300  | -0.06359000 |
| C                       | 3.02662600  | 2.27399500  | 2.69104900  |
| H                       | 2.34958200  | 0.23057500  | 2.63702500  |
| C                       | 3.69338400  | 3.22242500  | 0.57174600  |
| H                       | 3.50385200  | 1.93539900  | -1.14041600 |
| C                       | 3.50767500  | 3.35454400  | 1.95055900  |
| H                       | 2.87550300  | 2.36908400  | 3.76314700  |
| H                       | 4.07145900  | 4.05838300  | -0.01157000 |
| H                       | 3.73676100  | 4.29581000  | 2.44358700  |
| C                       | -1.09456300 | 1.16804000  | 1.55843000  |
| C                       | -0.51732100 | -0.03806700 | 2.00336100  |
| C                       | -1.33796000 | 2.24039800  | 2.41644700  |
| C                       | -0.16416800 | -0.10996900 | 3.35742900  |
| C                       | -0.99229200 | 2.13120400  | 3.76543800  |
| H                       | -1.75872100 | 3.16749300  | 2.03297700  |

|   |             |             |             |
|---|-------------|-------------|-------------|
| C | -0.39855500 | 0.95515000  | 4.22943800  |
| H | 0.30136700  | -1.01805300 | 3.73714200  |
| H | -1.16481500 | 2.96452600  | 4.44225500  |
| H | -0.10854100 | 0.87303600  | 5.27508600  |
| C | -1.05975000 | 2.92694600  | -0.71310900 |
| C | -1.93610200 | 3.64001300  | -1.53608600 |
| C | 0.14126400  | 3.52437100  | -0.30135400 |
| C | -1.61644400 | 4.93808200  | -1.94197100 |
| H | -2.86839800 | 3.18333500  | -1.85804300 |
| C | 0.45507500  | 4.81868000  | -0.70304200 |
| H | 0.82939900  | 2.96982500  | 0.33172200  |
| C | -0.42324400 | 5.52978600  | -1.52699400 |
| H | -2.30407100 | 5.48689200  | -2.58091500 |
| H | 1.38730900  | 5.27114500  | -0.37450200 |
| H | -0.17701500 | 6.54035100  | -1.84308800 |
| C | -3.10193300 | 0.89472000  | -0.57393000 |
| C | -4.10908400 | 1.33378900  | 0.29206700  |
| C | -3.44364200 | 0.18648900  | -1.73004300 |
| C | -5.44495600 | 1.06380900  | 0.00257400  |
| H | -3.84685900 | 1.87135100  | 1.19958100  |
| C | -4.78015100 | -0.07270700 | -2.02537600 |
| H | -2.65584100 | -0.18724000 | -2.37896000 |
| C | -5.78197100 | 0.36268300  | -1.15790600 |
| H | -6.22411800 | 1.39600200  | 0.68433000  |
| H | -5.03663300 | -0.63524200 | -2.91915300 |
| H | -6.82452400 | 0.14740700  | -1.37878600 |
| B | -0.32708000 | -1.22933600 | 0.93706500  |
| C | -1.65435600 | -1.94218200 | 0.36434100  |
| C | -1.60614300 | -2.61224000 | -0.88414900 |
| C | -2.90654500 | -1.94686300 | 1.03779100  |
| C | -2.74639400 | -3.18684900 | -1.45012700 |
| C | -4.03083800 | -2.52617600 | 0.44065400  |
| C | -3.98412400 | -3.13630700 | -0.81102500 |
| H | -2.66695600 | -3.67765000 | -2.42010900 |
| H | -4.97957500 | -2.49612000 | 0.97575700  |
| C | -0.32791000 | -2.69301100 | -1.67330000 |
| H | -0.44331800 | -3.32509200 | -2.56101000 |
| H | -0.02320300 | -1.69161300 | -2.04175100 |
| H | 0.50520100  | -3.07735400 | -1.07700300 |
| C | -3.10663300 | -1.38151800 | 2.42231000  |
| H | -2.33912400 | -1.72763300 | 3.12042100  |
| H | -3.07062100 | -0.28753300 | 2.43361700  |
| H | -4.08321900 | -1.68602200 | 2.81430600  |
| C | -5.22393000 | -3.70838800 | -1.44075700 |

|   |             |             |             |
|---|-------------|-------------|-------------|
| H | -5.93941700 | -2.91291300 | -1.68777200 |
| H | -4.99123300 | -4.24829400 | -2.36498100 |
| H | -5.73679100 | -4.40210300 | -0.76324300 |
| C | 0.79272800  | 1.12040200  | -3.11622900 |
| H | 0.14971500  | 0.23454000  | -3.16985700 |
| H | 0.23084000  | 1.98608300  | -3.47006400 |
| H | 1.68807800  | 0.95371700  | -3.71714400 |
| H | 1.10309300  | 1.32376700  | -2.07713100 |

**TS<sub>2/3</sub><sup>Ni-B</sup>**

|    |             |             |             |
|----|-------------|-------------|-------------|
| Ni | 0.37426200  | 0.22034700  | -0.85042000 |
| P  | 2.43692200  | -0.31530600 | -0.33026600 |
| P  | -1.27458400 | 1.65012800  | -0.71336100 |
| C  | 3.82113000  | -0.54534300 | -1.50274100 |
| C  | 3.72514300  | -1.53649600 | -2.49157300 |
| C  | 4.92401200  | 0.31859700  | -1.51425300 |
| C  | 4.71388700  | -1.66425600 | -3.46450300 |
| H  | 2.88358800  | -2.22387300 | -2.48645600 |
| C  | 5.91205700  | 0.19067200  | -2.49085500 |
| H  | 5.01453000  | 1.08912800  | -0.75336600 |
| C  | 5.81111500  | -0.79975100 | -3.46884700 |
| H  | 4.62904500  | -2.44254400 | -4.21896000 |
| H  | 6.76579500  | 0.86397300  | -2.48239900 |
| H  | 6.58282100  | -0.90023700 | -4.22765900 |
| C  | 2.12506800  | -2.02139900 | 0.29460900  |
| C  | 3.17157700  | -2.94089800 | 0.43161400  |
| C  | 0.78552000  | -2.39249000 | 0.58762800  |
| C  | 2.92423800  | -4.23839700 | 0.87874100  |
| H  | 4.18560400  | -2.64938000 | 0.16710000  |
| C  | 0.57258500  | -3.70857300 | 1.02868100  |
| C  | 1.61678400  | -4.62092700 | 1.18070800  |
| H  | 3.74476700  | -4.94453600 | 0.98132400  |
| H  | -0.44569100 | -4.01891400 | 1.25423200  |
| H  | 1.40984900  | -5.63149200 | 1.52622600  |
| C  | 3.20371700  | 0.60718100  | 1.05066300  |
| C  | 3.99508400  | 0.00781700  | 2.03658000  |
| C  | 2.94658100  | 1.98077900  | 1.11679200  |
| C  | 4.51735700  | 0.77419900  | 3.07675800  |
| H  | 4.18445500  | -1.06123000 | 2.00482800  |
| C  | 3.47851700  | 2.75005200  | 2.15016500  |
| H  | 2.29726000  | 2.43260000  | 0.37062300  |
| C  | 4.26178500  | 2.14674900  | 3.13430700  |
| H  | 5.12186500  | 0.30013200  | 3.84630900  |

|   |             |             |             |
|---|-------------|-------------|-------------|
| H | 3.26327400  | 3.81448300  | 2.19804200  |
| H | 4.66669900  | 2.74145700  | 3.94943100  |
| C | -0.74877200 | 1.29375800  | 1.01380400  |
| C | -0.19360300 | -0.00257900 | 1.28797600  |
| C | -0.58177100 | 2.34438000  | 1.93433900  |
| C | 0.57974200  | -0.11475700 | 2.47014200  |
| C | 0.09251900  | 2.14451600  | 3.13211500  |
| H | -0.99777000 | 3.32174800  | 1.70906000  |
| C | 0.69539400  | 0.91122000  | 3.39293300  |
| H | 1.05545500  | -1.06747000 | 2.68365100  |
| H | 0.17031000  | 2.95712500  | 3.85042900  |
| H | 1.26450600  | 0.76035600  | 4.30624300  |
| C | -1.49999700 | 3.46508700  | -0.72401900 |
| C | -2.73670300 | 4.08974800  | -0.52454300 |
| C | -0.36160000 | 4.25114300  | -0.94841000 |
| C | -2.82860500 | 5.48223600  | -0.53595900 |
| H | -3.62637300 | 3.48779200  | -0.35966800 |
| C | -0.45105100 | 5.64141900  | -0.94498000 |
| H | 0.59424000  | 3.76035300  | -1.12494700 |
| C | -1.68720600 | 6.25974700  | -0.74006100 |
| H | -3.79292700 | 5.96035300  | -0.38210700 |
| H | 0.43902200  | 6.24253100  | -1.11358000 |
| H | -1.76141600 | 7.34420700  | -0.74768600 |
| C | -2.94807300 | 0.99064900  | -0.97603300 |
| C | -3.83480300 | 0.73909600  | 0.07487000  |
| C | -3.34026500 | 0.70872800  | -2.29188100 |
| C | -5.09825900 | 0.21217300  | -0.18559800 |
| H | -3.52819100 | 0.94165100  | 1.09662800  |
| C | -4.60653500 | 0.18852800  | -2.55178200 |
| H | -2.65130700 | 0.89867600  | -3.11184500 |
| C | -5.48584100 | -0.06296300 | -1.49667600 |
| H | -5.77294300 | 0.00045500  | 0.63890800  |
| H | -4.90301000 | -0.03093200 | -3.57443000 |
| H | -6.46848200 | -0.48282600 | -1.69620700 |
| B | -0.44973000 | -1.36669300 | 0.47845100  |
| C | -1.93277500 | -1.99743800 | 0.51938800  |
| C | -2.43581400 | -2.81241200 | -0.52476500 |
| C | -2.77827700 | -1.83848000 | 1.65374700  |
| C | -3.74315400 | -3.30978500 | -0.49411200 |
| C | -4.07067100 | -2.37243200 | 1.66066400  |
| C | -4.59607900 | -3.07589700 | 0.57916800  |
| H | -4.09604300 | -3.90699100 | -1.33499000 |
| H | -4.69223000 | -2.22439700 | 2.54344500  |
| C | -1.61013800 | -3.21358400 | -1.72023300 |

|   |             |             |             |
|---|-------------|-------------|-------------|
| H | -1.77554400 | -2.53895200 | -2.56726500 |
| H | -0.54086100 | -3.23004100 | -1.50015500 |
| H | -1.89438300 | -4.21824400 | -2.05305400 |
| C | -2.35514700 | -1.15309400 | 2.93146600  |
| H | -1.40454700 | -1.54390900 | 3.30594700  |
| H | -2.22643700 | -0.07226200 | 2.81682600  |
| H | -3.11032100 | -1.31563000 | 3.70810000  |
| C | -6.02176000 | -3.55229800 | 0.57094700  |
| H | -6.68296900 | -2.78923700 | 0.13694300  |
| H | -6.13992600 | -4.46221600 | -0.02798700 |
| H | -6.38397800 | -3.75860200 | 1.58434200  |
| C | 0.17946000  | -0.74059700 | -2.57187500 |
| H | -0.79558800 | -0.70281300 | -3.05833500 |
| H | 0.83866500  | 0.01406100  | -3.01314300 |
| H | 0.62296800  | -1.72816800 | -2.70588800 |
| H | -0.34777300 | -1.04654400 | -1.21522100 |

**3Ni-B**

|    |             |             |             |
|----|-------------|-------------|-------------|
| Ni | 0.54532400  | 0.54627400  | -0.91151000 |
| P  | 2.39319600  | -0.42503800 | -0.35856300 |
| P  | -1.31409100 | 1.54169400  | -0.39010100 |
| C  | 3.53602900  | -0.87781800 | -1.69894800 |
| C  | 3.41227700  | -2.12540400 | -2.32546700 |
| C  | 4.43873600  | 0.06311200  | -2.21281900 |
| C  | 4.19473800  | -2.43318900 | -3.43673800 |
| H  | 2.70738900  | -2.85678500 | -1.93920800 |
| C  | 5.22027200  | -0.24880700 | -3.32431300 |
| H  | 4.53371900  | 1.03751700  | -1.74209400 |
| C  | 5.10217000  | -1.49732000 | -3.93720200 |
| H  | 4.09588800  | -3.40607800 | -3.91127200 |
| H  | 5.92211800  | 0.48544100  | -3.71134600 |
| H  | 5.71362600  | -1.73973800 | -4.80244000 |
| C  | 2.09108300  | -1.96382900 | 0.57962800  |
| C  | 3.16022500  | -2.81672500 | 0.88666200  |
| C  | 0.77792600  | -2.23601400 | 1.00966200  |
| C  | 2.93947000  | -3.97546900 | 1.62528500  |
| H  | 4.16282200  | -2.58798000 | 0.53321300  |
| C  | 0.58870900  | -3.41975400 | 1.74273900  |
| C  | 1.64369400  | -4.27657100 | 2.05285200  |
| H  | 3.76710900  | -4.64185000 | 1.85521300  |
| H  | -0.41861500 | -3.67596100 | 2.06432800  |
| H  | 1.45670700  | -5.18489600 | 2.62163600  |
| C  | 3.36500400  | 0.61696200  | 0.78590900  |
| C  | 4.72478300  | 0.39010600  | 1.03245300  |

|   |             |             |             |
|---|-------------|-------------|-------------|
| C | 2.69402800  | 1.61997000  | 1.49635400  |
| C | 5.40373900  | 1.15976700  | 1.97549000  |
| H | 5.25787000  | -0.38128100 | 0.48347900  |
| C | 3.37267400  | 2.38341500  | 2.44431400  |
| H | 1.63669500  | 1.79097600  | 1.31529200  |
| C | 4.72840800  | 2.15638700  | 2.68414700  |
| H | 6.46022000  | 0.98041800  | 2.15802200  |
| H | 2.83808000  | 3.15298900  | 2.99471300  |
| H | 5.25950200  | 2.75407900  | 3.42060600  |
| C | -1.04576600 | 1.27350000  | 1.40042200  |
| C | -0.47179700 | 0.02867200  | 1.76868900  |
| C | -1.14549100 | 2.33106500  | 2.31352900  |
| C | 0.07603000  | -0.05154000 | 3.05628400  |
| C | -0.63491400 | 2.19166500  | 3.60356800  |
| H | -1.59410200 | 3.27293200  | 2.01038800  |
| C | 0.00402300  | 1.00393800  | 3.96317400  |
| H | 0.57087200  | -0.97373000 | 3.35392000  |
| H | -0.71170600 | 3.01454100  | 4.30999000  |
| H | 0.44739200  | 0.90210000  | 4.95125500  |
| C | -1.53730200 | 3.33799400  | -0.58019400 |
| C | -2.75247900 | 3.90102000  | -0.98449500 |
| C | -0.44356400 | 4.17611500  | -0.31582000 |
| C | -2.87356500 | 5.28515300  | -1.11915600 |
| H | -3.60421100 | 3.25934500  | -1.19092200 |
| C | -0.56980600 | 5.55662500  | -0.44167700 |
| H | 0.50303000  | 3.74289700  | -0.00475900 |
| C | -1.78545200 | 6.11424400  | -0.84692600 |
| H | -3.82164600 | 5.71397400  | -1.43354600 |
| H | 0.28218000  | 6.19758000  | -0.23013600 |
| H | -1.88170700 | 7.19184000  | -0.95166000 |
| C | -2.89068700 | 0.81807100  | -0.91532800 |
| C | -3.89263800 | 0.47990100  | -0.00252600 |
| C | -3.08078300 | 0.58136500  | -2.28234100 |
| C | -5.08112400 | -0.08817300 | -0.45578400 |
| H | -3.73104500 | 0.64202300  | 1.05913500  |
| C | -4.27483700 | 0.02426600  | -2.73343700 |
| H | -2.29020600 | 0.82797300  | -2.98801400 |
| C | -5.27450800 | -0.31194600 | -1.81896600 |
| H | -5.84791300 | -0.37346000 | 0.25855300  |
| H | -4.41906300 | -0.16212400 | -3.79456600 |
| H | -6.19951400 | -0.76328400 | -2.16844100 |
| B | -0.46179700 | -1.23345900 | 0.75800400  |
| C | -1.87336200 | -2.00012300 | 0.53359700  |
| C | -2.15354000 | -2.55546300 | -0.74099900 |



|   |             |             |             |
|---|-------------|-------------|-------------|
| C | -2.84744000 | -2.18133200 | 1.54218000  |
| C | -3.37070200 | -3.19235800 | -0.99380000 |
| C | -4.05037600 | -2.84102300 | 1.26017800  |
| C | -4.34642300 | -3.33405500 | -0.00804900 |
| H | -3.56248500 | -3.58793400 | -1.99111000 |
| H | -4.78266700 | -2.96211500 | 2.05867000  |
| C | -1.16081900 | -2.48683400 | -1.87403100 |
| H | -1.06914800 | -1.46655000 | -2.27097200 |
| H | -0.15835900 | -2.79454100 | -1.55615400 |
| H | -1.47189900 | -3.13586800 | -2.69989600 |
| C | -2.66178500 | -1.68878300 | 2.95613900  |
| H | -1.70450500 | -2.00474700 | 3.38155000  |
| H | -2.68145300 | -0.59456900 | 3.01709000  |
| H | -3.45884700 | -2.07382700 | 3.60188400  |
| C | -5.67562500 | -3.96792500 | -0.31418400 |
| H | -6.34918300 | -3.24752800 | -0.79919500 |
| H | -5.57009200 | -4.81948300 | -0.99640300 |
| H | -6.17267700 | -4.31971300 | 0.59659300  |
| C | 1.44545300  | 1.93470000  | -1.88104700 |
| H | 0.74325000  | 2.68267600  | -2.26016100 |
| H | 2.21225100  | 2.44090900  | -1.28262500 |
| H | 1.93583700  | 1.43405000  | -2.72670400 |
| H | -0.30031300 | -0.79377400 | -0.44575100 |

**1<sup>BPh</sup>**

|    |             |             |             |
|----|-------------|-------------|-------------|
| Ni | -0.08504900 | -0.17951600 | 0.73899400  |
| P  | 1.73918600  | -0.05396600 | -0.48023400 |
| C  | 3.02686900  | 0.81840600  | 0.63576400  |
| C  | 1.58859700  | 0.91471800  | -2.12182700 |
| C  | 2.35930900  | -1.81867300 | -0.88030900 |
| C  | 2.71948500  | 2.32332700  | 0.66567100  |
| H  | 1.66895500  | 2.51475300  | 0.90564700  |
| H  | 3.32985900  | 2.78464800  | 1.45317900  |
| H  | 2.96185000  | 2.83043500  | -0.27017400 |
| C  | 2.79483000  | 0.32612700  | 2.07730500  |
| H  | 1.75490400  | 0.48847800  | 2.38867200  |
| H  | 3.01819900  | -0.73053700 | 2.21921200  |
| H  | 3.44542300  | 0.89790100  | 2.75340100  |
| C  | 4.49813600  | 0.62093700  | 0.25805300  |
| H  | 4.71574900  | 0.94536600  | -0.76236200 |
| H  | 5.12278700  | 1.21908600  | 0.93577700  |
| H  | 4.81823200  | -0.41872500 | 0.36113600  |
| C  | 0.66416300  | 2.11932300  | -1.88191100 |
| H  | 1.05725300  | 2.83765000  | -1.16414700 |

|   |             |             |             |
|---|-------------|-------------|-------------|
| H | 0.52249300  | 2.64656900  | -2.83498800 |
| H | -0.31728200 | 1.80098200  | -1.52100700 |
| C | 2.91550100  | 1.39580500  | -2.71942800 |
| H | 2.71380800  | 1.86548200  | -3.69191300 |
| H | 3.40721200  | 2.14656200  | -2.09670800 |
| H | 3.62032400  | 0.57837500  | -2.88849000 |
| C | 0.87133400  | 0.04341000  | -3.16307600 |
| H | -0.04851300 | -0.39251400 | -2.76463900 |
| H | 0.59499800  | 0.68199300  | -4.01239100 |
| H | 1.50060400  | -0.75847900 | -3.55448100 |
| C | 3.50726700  | -1.91513300 | -1.89092200 |
| H | 3.80844900  | -2.96772600 | -1.98300000 |
| H | 3.21707600  | -1.57693300 | -2.88825600 |
| H | 4.38800100  | -1.34761100 | -1.58077700 |
| C | 2.79999900  | -2.49151600 | 0.42750000  |
| H | 2.96537100  | -3.55872700 | 0.22985800  |
| H | 3.73602500  | -2.08771300 | 0.81927700  |
| H | 2.02879000  | -2.40931200 | 1.19893300  |
| C | 1.15810300  | -2.63733700 | -1.38861300 |
| H | 0.81089500  | -2.33302500 | -2.37506400 |
| H | 1.45658300  | -3.69218200 | -1.45571700 |
| H | 0.31247000  | -2.56431800 | -0.69880300 |
| B | -2.21636700 | 0.06944300  | 0.63219400  |
| C | -2.78070800 | -0.89121100 | -0.47954700 |
| C | -2.59382300 | -0.62150100 | -1.84905900 |
| C | -3.43458800 | -2.09505100 | -0.15311800 |
| C | -3.01189500 | -1.50877300 | -2.83945000 |
| C | -3.87224100 | -2.98365900 | -1.13479300 |
| C | -3.65468200 | -2.69691800 | -2.48465200 |
| C | -1.62254200 | -0.51974700 | 1.94052200  |
| C | -1.49111200 | 0.17825800  | 3.18472300  |
| C | -0.87293600 | -1.74389000 | 1.81377800  |
| C | -0.73032800 | -0.31250100 | 4.22469800  |
| C | -0.10511100 | -2.24012100 | 2.90134500  |
| C | -0.02387300 | -1.53167400 | 4.08086300  |
| C | -2.22515100 | 1.62591900  | 0.40223100  |
| C | -1.27838500 | 2.47228100  | 1.02122800  |
| C | -3.09766100 | 2.23376800  | -0.52593300 |
| C | -1.18565300 | 3.82970500  | 0.71574500  |
| C | -3.02276300 | 3.59083100  | -0.82843400 |
| C | -2.05663500 | 4.39454400  | -0.21504400 |
| H | -2.09764800 | 0.30037600  | -2.14087400 |
| H | -2.83842300 | -1.27474400 | -3.88775600 |
| H | -3.98642000 | -3.39151900 | -3.25292000 |

|   |             |             |             |
|---|-------------|-------------|-------------|
| H | -4.37999200 | -3.90249600 | -0.84922100 |
| H | -3.60204000 | -2.33467800 | 0.89515000  |
| H | -1.08404500 | -2.42140100 | 0.98906600  |
| H | 0.40657400  | -3.19456000 | 2.79995300  |
| H | 0.56896400  | -1.91242800 | 4.90935000  |
| H | -0.67623300 | 0.23264800  | 5.16430400  |
| H | -2.03668600 | 1.11018700  | 3.31552000  |
| H | -3.85111200 | 1.62296500  | -1.01711200 |
| H | -3.71518500 | 4.02597700  | -1.54574700 |
| H | -1.98921000 | 5.45223300  | -0.45873800 |
| H | -0.43076300 | 4.44461200  | 1.20093800  |
| H | -0.58391600 | 2.05315800  | 1.74676300  |

**2<sup>BPh</sup>**

|    |             |             |             |
|----|-------------|-------------|-------------|
| Ni | -0.21103800 | -0.82618300 | 0.23370100  |
| B  | 1.91725500  | -1.01251400 | 0.60489100  |
| C  | 2.86947500  | -0.74357900 | -0.62913400 |
| C  | 2.38214700  | -0.30351100 | -1.87033800 |
| C  | 4.25969900  | -0.92222000 | -0.51642400 |
| C  | 3.22986600  | -0.06067600 | -2.95197000 |
| C  | 5.11819100  | -0.68166100 | -1.59033100 |
| C  | 4.60537800  | -0.25036700 | -2.81602800 |
| C  | 1.90490000  | 0.03064200  | 1.77849900  |
| C  | 0.88723100  | 0.05655900  | 2.76002600  |
| C  | 2.82190800  | 1.10537700  | 1.79630300  |
| C  | 0.79183700  | 1.08516300  | 3.69786900  |
| C  | 2.73811500  | 2.13118600  | 2.73138700  |
| C  | 1.71639500  | 2.12812900  | 3.68658600  |
| C  | 1.03266800  | -2.28587700 | 0.66194000  |
| C  | 0.36536500  | -2.64027400 | -0.56336500 |
| C  | 0.60298900  | -2.97466500 | 1.84301900  |
| C  | -0.62309100 | -3.66084800 | -0.58296400 |
| C  | -0.36582100 | -3.95552600 | 1.80510000  |
| C  | -0.99400200 | -4.29688300 | 0.58217000  |
| C  | 3.50940800  | 3.19432100  | -1.01246000 |
| H  | 3.41213800  | 3.78916800  | -1.92405100 |
| H  | 2.54392100  | 3.13662500  | -0.50716300 |
| H  | 4.23919000  | 3.66306800  | -0.34766000 |
| H  | 3.83726400  | 2.18554500  | -1.26982500 |
| P  | -1.80361400 | 0.55227100  | -0.41089300 |
| C  | -3.19056100 | 0.39364600  | 0.89986700  |
| C  | -3.26282300 | -1.08966500 | 1.31090100  |
| C  | -2.77093000 | 1.15079700  | 2.16819600  |
| C  | -4.58192900 | 0.87865800  | 0.48016400  |

|   |             |             |             |
|---|-------------|-------------|-------------|
| H | -3.60968300 | -1.74644800 | 0.51406000  |
| H | -2.28279400 | -1.45826200 | 1.63973100  |
| H | -3.96276800 | -1.18888800 | 2.15192100  |
| H | -2.80557800 | 2.23568500  | 2.05027900  |
| H | -3.47009600 | 0.88897300  | 2.97334100  |
| H | -1.76657900 | 0.86632900  | 2.49366400  |
| H | -5.26313300 | 0.78359500  | 1.33699100  |
| H | -4.58364100 | 1.92759500  | 0.17399800  |
| H | -5.00553200 | 0.28548100  | -0.33334900 |
| C | -1.27599500 | 2.38618200  | -0.53218200 |
| C | -2.42491500 | 3.40061800  | -0.52614100 |
| C | -0.32415400 | 2.68281800  | 0.63737700  |
| C | -0.43731100 | 2.59676000  | -1.80141600 |
| H | -3.14215300 | 3.23267400  | -1.33259900 |
| H | -2.97070100 | 3.40519700  | 0.42015800  |
| H | -2.00547000 | 4.40702400  | -0.66063800 |
| H | 0.53948200  | 2.01361200  | 0.62158600  |
| H | 0.04318800  | 3.71288300  | 0.53565500  |
| H | -0.79017900 | 2.59623900  | 1.61714700  |
| H | -0.00405200 | 3.60443200  | -1.76105400 |
| H | 0.39535400  | 1.88913700  | -1.85662500 |
| H | -1.02206800 | 2.53414700  | -2.72136800 |
| C | -2.51603400 | 0.01592600  | -2.10392900 |
| C | -3.26699400 | -1.31316300 | -1.93723500 |
| C | -3.44797100 | 1.02543600  | -2.78328700 |
| C | -1.33542100 | -0.29850400 | -3.03861200 |
| H | -2.65775200 | -2.05459100 | -1.41168000 |
| H | -4.21986100 | -1.20358700 | -1.41571300 |
| H | -3.48877800 | -1.71132800 | -2.93623700 |
| H | -2.92916100 | 1.94103400  | -3.07637800 |
| H | -3.84772600 | 0.57360600  | -3.70148000 |
| H | -4.29880600 | 1.30095500  | -2.15576800 |
| H | -1.73325700 | -0.66006400 | -3.99650200 |
| H | -0.70263000 | 0.56280100  | -3.25108500 |
| H | -0.70904000 | -1.08684400 | -2.61327300 |
| H | 2.81653500  | 0.28382000  | -3.89768000 |
| H | 1.31373300  | -0.13645800 | -1.98333700 |
| H | 5.27235000  | -0.06085800 | -3.65369000 |
| H | 6.18934900  | -0.82999000 | -1.47106400 |
| H | 4.67972000  | -1.25751800 | 0.43095200  |
| H | 0.79481800  | -2.32855500 | -1.51371700 |
| H | -1.07099300 | -3.94863100 | -1.53147400 |
| H | -1.75297300 | -5.07553800 | 0.56466000  |
| H | -0.64445000 | -4.47939700 | 2.71663800  |

|   |             |             |            |
|---|-------------|-------------|------------|
| H | 1.08931200  | -2.74252800 | 2.78774300 |
| H | 3.60585000  | 1.13673100  | 1.04574200 |
| H | 3.46119100  | 2.94341100  | 2.71137900 |
| H | 1.64187100  | 2.93495700  | 4.41187700 |
| H | -0.01013000 | 1.07536400  | 4.43269500 |
| H | 0.14597800  | -0.73776600 | 2.78695800 |

**TS<sub>2/3</sub><sup>BPh</sup>**

|    |             |             |             |
|----|-------------|-------------|-------------|
| Ni | 0.11219600  | 0.00658900  | -0.47896800 |
| B  | 2.10700700  | 0.00311300  | 0.19669900  |
| C  | 3.52916100  | -0.12261400 | -0.52896600 |
| C  | 3.75065100  | -1.00529900 | -1.60051300 |
| C  | 4.63983800  | 0.59909300  | -0.06059300 |
| C  | 5.00841000  | -1.15837900 | -2.18239000 |
| C  | 5.90727000  | 0.44763100  | -0.62697500 |
| C  | 6.09654400  | -0.43029100 | -1.69506000 |
| C  | 1.73133400  | 1.41688000  | 0.83916700  |
| C  | 0.94603600  | 1.58535700  | 1.99523200  |
| C  | 2.10547900  | 2.60105600  | 0.16002000  |
| C  | 0.57178600  | 2.85070900  | 2.46036500  |
| C  | 1.72573200  | 3.86150800  | 0.60384200  |
| C  | 0.95593700  | 3.99379500  | 1.76642400  |
| C  | 1.61074600  | -1.33975700 | 0.91797000  |
| C  | 1.07072300  | -2.42407700 | 0.19351000  |
| C  | 1.76173800  | -1.52261200 | 2.30900400  |
| C  | 0.67496700  | -3.60793100 | 0.82262900  |
| C  | 1.38956000  | -2.70641100 | 2.94065100  |
| C  | 0.82760700  | -3.75073000 | 2.19965300  |
| C  | 0.66084900  | 0.69703100  | -2.28649300 |
| H  | 0.02608800  | 0.12604800  | -2.96186800 |
| H  | 0.31670800  | 1.72664100  | -2.17426700 |
| H  | 1.66869600  | 0.73150000  | -2.71601700 |
| H  | 1.42523900  | 0.09552400  | -1.17142000 |
| P  | -2.14061000 | -0.01696600 | -0.36319400 |
| C  | -2.77534400 | -0.30896800 | 1.42297600  |
| C  | -1.88613200 | -1.38377100 | 2.06784600  |
| C  | -2.56422100 | 0.96181100  | 2.25748000  |
| C  | -4.24500600 | -0.72684900 | 1.55458400  |
| H  | -1.95590800 | -2.35794100 | 1.58782100  |
| H  | -0.83417700 | -1.09001800 | 2.06049700  |
| H  | -2.19178500 | -1.50830400 | 3.11535700  |
| H  | -3.27947100 | 1.75250600  | 2.02307300  |
| H  | -2.70195200 | 0.70450600  | 3.31598400  |

|   |             |             |             |
|---|-------------|-------------|-------------|
| H | -1.55482700 | 1.35827600  | 2.14090100  |
| H | -4.49170800 | -0.78616100 | 2.62353300  |
| H | -4.93186200 | -0.00940400 | 1.10030600  |
| H | -4.44491700 | -1.71122200 | 1.12648800  |
| C | -2.83770600 | 1.66405600  | -0.95977800 |
| C | -4.29815600 | 1.95397100  | -0.59135200 |
| C | -1.93901200 | 2.76726900  | -0.37043000 |
| C | -2.71634200 | 1.76847900  | -2.48842500 |
| H | -4.98772600 | 1.20535000  | -0.98816800 |
| H | -4.45613400 | 2.02743300  | 0.48602800  |
| H | -4.58019900 | 2.92357600  | -1.02416900 |
| H | -0.87815800 | 2.57408600  | -0.55538500 |
| H | -2.20038200 | 3.72434400  | -0.84146800 |
| H | -2.06085000 | 2.88837200  | 0.70527800  |
| H | -2.97244000 | 2.79521900  | -2.78103000 |
| H | -1.70255700 | 1.57275800  | -2.84123500 |
| H | -3.40497900 | 1.10457300  | -3.01512000 |
| C | -2.87838700 | -1.40549000 | -1.45915200 |
| C | -2.65016100 | -2.76562000 | -0.78304300 |
| C | -4.36792600 | -1.26646400 | -1.79574400 |
| C | -2.07407100 | -1.47044700 | -2.76773700 |
| H | -1.60843800 | -2.89014100 | -0.47581300 |
| H | -3.29289400 | -2.92998800 | 0.08340900  |
| H | -2.88041300 | -3.55445600 | -1.51140900 |
| H | -4.57305900 | -0.40413400 | -2.43402400 |
| H | -4.68641300 | -2.15993900 | -2.35004900 |
| H | -4.99742600 | -1.19017000 | -0.90745500 |
| H | -2.49138500 | -2.26979500 | -3.39470600 |
| H | -2.10682700 | -0.54772800 | -3.34768400 |
| H | -1.02649800 | -1.71294000 | -2.56524800 |
| H | 5.14175400  | -1.84557200 | -3.01534700 |
| H | 2.91773400  | -1.58678900 | -1.99280500 |
| H | 7.08042400  | -0.54694000 | -2.14343300 |
| H | 6.74730000  | 1.01756400  | -0.23520800 |
| H | 4.50984500  | 1.29065600  | 0.76934300  |
| H | 0.98036600  | -2.35167200 | -0.88921700 |
| H | 0.25771100  | -4.42115000 | 0.23302200  |
| H | 0.52558700  | -4.67169800 | 2.69253000  |
| H | 1.53673300  | -2.81831700 | 4.01259900  |
| H | 2.21246700  | -0.73002400 | 2.90140000  |
| H | 2.70151700  | 2.51711400  | -0.74615100 |
| H | 2.02880200  | 4.74677700  | 0.04874300  |
| H | 0.66159000  | 4.97860900  | 2.12140900  |
| H | -0.02944700 | 2.93748900  | 3.36303600  |

|   |            |            |            |
|---|------------|------------|------------|
| H | 0.62548700 | 0.71239700 | 2.55525500 |
|---|------------|------------|------------|

**3<sup>BPh</sup>**

|    |            |             |             |
|----|------------|-------------|-------------|
| Ni | 0.22040400 | -0.13187000 | -0.56773300 |
| P  | 2.40830000 | 0.01103500  | -0.30762200 |
| C  | 2.44470500 | 1.71573800  | 0.55051700  |
| C  | 3.53139400 | 0.07344000  | -1.84904900 |
| C  | 3.04528100 | -1.33284000 | 0.87592500  |
| C  | 2.27588000 | 2.84201200  | -0.48115900 |
| H  | 1.40936600 | 2.67357800  | -1.12829000 |
| H  | 2.09656800 | 3.77601600  | 0.06625800  |
| H  | 3.15867800 | 2.99690000  | -1.10376600 |
| C  | 1.17078900 | 1.76084200  | 1.41025800  |
| H  | 0.26129100 | 1.63166200  | 0.79906700  |
| H  | 1.14781600 | 1.02530700  | 2.21067600  |
| H  | 1.07073100 | 2.75729500  | 1.86064400  |
| C  | 3.67142500 | 2.01143600  | 1.41659400  |
| H  | 4.60167800 | 1.99093600  | 0.84397900  |
| H  | 3.56573700 | 3.01888500  | 1.84109900  |
| H  | 3.77052800 | 1.31743300  | 2.25370200  |
| C  | 2.78290200 | 0.79764400  | -2.98068300 |
| H  | 2.56191700 | 1.83981500  | -2.75456000 |
| H  | 3.41574700 | 0.78292000  | -3.87763500 |
| H  | 1.84379000 | 0.29647000  | -3.22128100 |
| C  | 4.86614700 | 0.78560600  | -1.58598200 |
| H  | 5.47230300 | 0.73378700  | -2.49996100 |
| H  | 4.73912700 | 1.84228100  | -1.34511000 |
| H  | 5.44108900 | 0.31838900  | -0.78351800 |
| C  | 3.84936400 | -1.33599200 | -2.37421400 |
| H  | 2.94973500 | -1.91007500 | -2.60599600 |
| H  | 4.41228900 | -1.22423400 | -3.30967100 |
| H  | 4.47272800 | -1.91723400 | -1.69287200 |
| C  | 4.56291800 | -1.36537200 | 1.08459900  |
| H  | 4.79313600 | -2.13019000 | 1.83809900  |
| H  | 5.11131300 | -1.63279900 | 0.17871300  |
| H  | 4.95314700 | -0.41337000 | 1.45360600  |
| C  | 2.36082600 | -1.16038100 | 2.23713700  |
| H  | 2.58326000 | -2.04480300 | 2.84704500  |
| H  | 2.71645000 | -0.28881600 | 2.79061000  |
| H  | 1.27481200 | -1.10419400 | 2.13936500  |
| C  | 2.55293300 | -2.68678700 | 0.33349500  |
| H  | 2.96822300 | -2.94707400 | -0.64020100 |
| H  | 2.85210600 | -3.47121300 | 1.04081700  |
| H  | 1.46159600 | -2.70016600 | 0.26123400  |

|   |             |             |             |
|---|-------------|-------------|-------------|
| B | -2.04034600 | 0.03307500  | -0.10837700 |
| C | -3.20352800 | -0.78892900 | -0.86340800 |
| C | -3.39685900 | -0.66668200 | -2.24940100 |
| C | -4.11509300 | -1.59726400 | -0.16537900 |
| C | -4.43934000 | -1.31651000 | -2.91107300 |
| C | -5.16870000 | -2.24734900 | -0.81179400 |
| C | -5.33412700 | -2.11188200 | -2.19136100 |
| C | -1.45542100 | -0.75756800 | 1.18514800  |
| C | -1.31087700 | -0.14579200 | 2.44437500  |
| C | -1.20401000 | -2.14714200 | 1.13580300  |
| C | -0.96892000 | -0.86921100 | 3.58898400  |
| C | -0.85279800 | -2.88015600 | 2.26752200  |
| C | -0.74173800 | -2.24317400 | 3.50621700  |
| C | -2.46392700 | 1.56608300  | 0.16477800  |
| C | -1.87554000 | 2.65285600  | -0.49984300 |
| C | -3.48831400 | 1.86662900  | 1.08031000  |
| C | -2.26488800 | 3.97274900  | -0.25667700 |
| C | -3.88967700 | 3.17775700  | 1.33412400  |
| C | -3.27405100 | 4.24152800  | 0.66789800  |
| H | -1.20765600 | 0.18395000  | -1.10353800 |
| C | 0.15529900  | -1.31644100 | -2.04147800 |
| H | -0.73528900 | -1.92752200 | -1.86739900 |
| H | 0.02114000  | -0.74938500 | -2.96728800 |
| H | 1.04232300  | -1.94635300 | -2.10330100 |
| H | -4.55504300 | -1.20399100 | -3.98740200 |
| H | -2.71093600 | -0.04490100 | -2.82435100 |
| H | -1.09336500 | 2.46107500  | -1.23456700 |
| H | -1.78302200 | 4.78918700  | -0.79138300 |
| H | -3.58389300 | 5.26560400  | 0.86327500  |
| H | -4.68554300 | 3.37273500  | 2.05035900  |
| H | -3.98402100 | 1.05056100  | 1.60411800  |
| H | -6.14947100 | -2.62102500 | -2.70037400 |
| H | -5.85943300 | -2.86325400 | -0.23892300 |
| H | -3.99604700 | -1.72472000 | 0.90924400  |
| H | -1.32420700 | -2.66864600 | 0.18925700  |
| H | -0.67293700 | -3.94993000 | 2.18604100  |
| H | -0.47629900 | -2.81147500 | 4.39457400  |
| H | -0.88297000 | -0.35907900 | 4.54620600  |
| H | -1.49489500 | 0.92203200  | 2.53305000  |

**1<sup>BCF</sup>**

|    |             |             |             |
|----|-------------|-------------|-------------|
| Ni | -0.87551100 | -0.28877500 | 0.28316100  |
| P  | -2.24019200 | 0.22263900  | -1.44321100 |
| C  | -3.72638200 | -0.95273200 | -1.17836400 |



|   |             |             |             |
|---|-------------|-------------|-------------|
| C | -1.53154700 | -0.08279600 | -3.19265400 |
| C | -2.81760800 | 2.03345200  | -1.32331400 |
| C | -3.32963200 | -2.37771300 | -1.59622000 |
| H | -2.40849900 | -2.70186200 | -1.10125100 |
| H | -4.12805600 | -3.06011100 | -1.27770000 |
| H | -3.21010700 | -2.50149900 | -2.67334000 |
| C | -3.99373100 | -1.04153900 | 0.33456100  |
| H | -3.12925100 | -1.46619700 | 0.85754700  |
| H | -4.23782600 | -0.08750800 | 0.79933900  |
| H | -4.84063300 | -1.71981600 | 0.50199900  |
| C | -5.02071100 | -0.55347400 | -1.89456200 |
| H | -4.89319700 | -0.44759700 | -2.97358900 |
| H | -5.77128900 | -1.33699100 | -1.72555400 |
| H | -5.43703100 | 0.37860800  | -1.50506500 |
| C | -0.59003900 | -1.29652000 | -3.11088700 |
| H | -1.06648300 | -2.20162400 | -2.73587100 |
| H | -0.20889900 | -1.51310600 | -4.11738900 |
| H | 0.27180700  | -1.07188500 | -2.47545200 |
| C | -2.59318300 | -0.30956200 | -4.27639000 |
| H | -2.08275800 | -0.40614400 | -5.24366800 |
| H | -3.17193500 | -1.22247500 | -4.12738900 |
| H | -3.28918000 | 0.52914500  | -4.35636400 |
| C | -0.65259800 | 1.09329500  | -3.64089900 |
| H | 0.10830600  | 1.34108400  | -2.90214200 |
| H | -0.12910000 | 0.78958600  | -4.55669900 |
| H | -1.22479400 | 1.99060100  | -3.88159000 |
| C | -3.62017100 | 2.54266400  | -2.52649800 |
| H | -3.93283600 | 3.57539900  | -2.32341600 |
| H | -3.03732800 | 2.56014800  | -3.44909400 |
| H | -4.52397600 | 1.95569800  | -2.70487700 |
| C | -3.67599000 | 2.20871000  | -0.06314500 |
| H | -3.86608900 | 3.28057700  | 0.07476200  |
| H | -4.64817000 | 1.71694000  | -0.13879700 |
| H | -3.16501800 | 1.85246000  | 0.83341300  |
| C | -1.56838600 | 2.91067400  | -1.11948200 |
| H | -0.92968900 | 2.96155800  | -2.00034700 |
| H | -1.89639900 | 3.93356900  | -0.89342600 |
| H | -0.96829100 | 2.55768900  | -0.27653900 |
| B | 1.25676700  | -0.10235400 | 0.83866700  |
| C | 1.74193800  | 1.37748000  | 0.59511600  |
| C | 2.02614000  | 1.85847200  | -0.68292400 |
| C | 1.93414500  | 2.29216200  | 1.63342600  |
| C | 2.40117500  | 3.16837300  | -0.94271500 |
| C | 2.31892700  | 3.60990700  | 1.41878000  |

|   |             |             |             |
|---|-------------|-------------|-------------|
| C | 2.54050200  | 4.05495300  | 0.11986900  |
| C | 0.21118700  | -0.44037100 | 1.92226400  |
| C | 0.12481500  | -1.68914100 | 2.60995300  |
| C | -0.91949200 | 0.45448800  | 2.08235300  |
| C | -0.94788200 | -2.04876600 | 3.37729100  |
| C | -2.01105700 | 0.07105100  | 2.92087300  |
| C | -2.04131600 | -1.15921000 | 3.51369000  |
| C | 2.04355700  | -1.26593200 | 0.09717800  |
| C | 1.42965600  | -2.41817500 | -0.39652500 |
| C | 3.42122600  | -1.19555100 | -0.13165300 |
| C | 2.09776400  | -3.41697800 | -1.08808800 |
| C | 4.13444900  | -2.17737000 | -0.80987900 |
| C | 3.46679700  | -3.29419000 | -1.29911800 |
| F | -3.08982500 | -1.54027700 | 4.24664500  |
| F | -0.98830800 | -3.21716100 | 4.02990600  |
| F | 1.16367300  | -2.53794200 | 2.55839000  |
| F | -3.02015200 | 0.93120200  | 3.11309800  |
| F | -0.77722900 | 1.81850900  | 2.00673000  |
| F | 1.77904200  | 1.90994700  | 2.90924700  |
| F | 2.48277800  | 4.45234700  | 2.44425300  |
| F | 2.90014600  | 5.31924600  | -0.10477000 |
| F | 2.63101300  | 3.58379200  | -2.19410100 |
| F | 1.93926200  | 1.03178800  | -1.74238400 |
| F | 4.13306100  | -0.15408200 | 0.32847500  |
| F | 5.45228600  | -2.05896500 | -0.99574200 |
| F | 4.13238200  | -4.24130200 | -1.95888300 |
| F | 1.44282700  | -4.48625900 | -1.55215900 |
| F | 0.10068500  | -2.60665900 | -0.22352800 |

**2<sup>BCF</sup>**

|    |             |             |             |
|----|-------------|-------------|-------------|
| Ni | 0.95544300  | 0.02722500  | 0.35282100  |
| B  | -1.18554300 | 0.38012200  | 0.81973000  |
| C  | -2.08526400 | -0.84040100 | 0.37686500  |
| C  | -2.41568700 | -1.08210300 | -0.95566600 |
| C  | -2.67951900 | -1.69900100 | 1.30442300  |
| C  | -3.24329300 | -2.11830500 | -1.36381400 |
| C  | -3.52528500 | -2.73911900 | 0.93965700  |
| C  | -3.80434400 | -2.95413300 | -0.40509500 |
| C  | -0.15625300 | 0.23510900  | 1.96073800  |
| C  | 0.26914900  | 1.28070200  | 2.83497100  |
| C  | 0.63538300  | -0.97781800 | 1.99179300  |
| C  | 1.36618500  | 1.17700000  | 3.64544100  |
| C  | 1.75162300  | -1.08034200 | 2.87550400  |
| C  | 2.13167800  | -0.01507500 | 3.64407800  |

|   |             |             |             |
|---|-------------|-------------|-------------|
| C | -1.57842100 | 1.81140900  | 0.25316900  |
| C | -0.64824000 | 2.82405800  | 0.00658000  |
| C | -2.89882100 | 2.14991900  | -0.06550300 |
| C | -0.96683600 | 4.05839400  | -0.53811400 |
| C | -3.26599000 | 3.37802300  | -0.60463500 |
| C | -2.29236400 | 4.33850700  | -0.85084100 |
| F | 3.20814300  | -0.08621300 | 4.42948200  |
| F | 1.73125100  | 2.16897900  | 4.46692200  |
| F | -0.46121500 | 2.40324700  | 2.91623600  |
| F | 2.42281100  | -2.23695800 | 2.94656300  |
| F | 0.08347700  | -2.19591300 | 1.69682500  |
| F | -2.47685800 | -1.51986600 | 2.61884100  |
| F | -4.06848800 | -3.53796300 | 1.86448300  |
| F | -4.60231000 | -3.95700100 | -0.77361300 |
| F | -3.50826900 | -2.31715700 | -2.66070400 |
| F | -1.93591400 | -0.27433200 | -1.91966500 |
| F | -3.90105200 | 1.28780200  | 0.16757400  |
| F | -4.54498500 | 3.64439200  | -0.88430400 |
| F | -2.62530200 | 5.51761000  | -1.37368300 |
| F | -0.01818700 | 4.97253800  | -0.76621700 |
| F | 0.65875200  | 2.62625400  | 0.28903000  |
| C | -1.21251200 | -5.13335900 | -0.37694200 |
| H | -0.38657300 | -5.84753400 | -0.40534600 |
| H | -1.01887900 | -4.38680900 | 0.39510400  |
| H | -2.14235800 | -5.66064500 | -0.15366900 |
| H | -1.29679900 | -4.63731100 | -1.34631500 |
| P | 2.28629200  | -0.38228400 | -1.43048300 |
| C | 4.05456800  | -0.26296600 | -0.70962400 |
| C | 4.07993500  | 0.92776200  | 0.26700600  |
| C | 4.35276600  | -1.50471800 | 0.14227900  |
| C | 5.17596700  | -0.10527100 | -1.74258300 |
| H | 3.88483200  | 1.88946800  | -0.20553700 |
| H | 3.34839500  | 0.79417100  | 1.07328400  |
| H | 5.07339900  | 0.97977100  | 0.73126700  |
| H | 4.49075300  | -2.40976800 | -0.45191100 |
| H | 5.28859900  | -1.32810700 | 0.68759700  |
| H | 3.57396400  | -1.68993700 | 0.88516600  |
| H | 6.13923300  | -0.11168800 | -1.21543200 |
| H | 5.19313500  | -0.92256600 | -2.46722100 |
| H | 5.11662000  | 0.83716200  | -2.29049800 |
| C | 2.01969400  | -2.12265800 | -2.15832500 |
| C | 3.19560400  | -2.66937300 | -2.97601500 |
| C | 1.71089800  | -3.07693900 | -0.99409800 |
| C | 0.76000700  | -2.12877900 | -3.03597900 |

|   |             |             |             |
|---|-------------|-------------|-------------|
| H | 3.47273300  | -2.01761100 | -3.80729300 |
| H | 4.08467900  | -2.84350800 | -2.36621800 |
| H | 2.90166800  | -3.63845100 | -3.40027600 |
| H | 0.80622000  | -2.76780600 | -0.46688500 |
| H | 1.53421300  | -4.07857900 | -1.40563200 |
| H | 2.51524900  | -3.15861500 | -0.26413300 |
| H | 0.51643500  | -3.17222400 | -3.27244100 |
| H | -0.09923700 | -1.70135800 | -2.51441900 |
| H | 0.89275700  | -1.60601400 | -3.98520300 |
| C | 2.10648600  | 0.91483300  | -2.82384700 |
| C | 2.66389700  | 2.26866400  | -2.35930900 |
| C | 2.79108000  | 0.53548700  | -4.14269600 |
| C | 0.60780800  | 1.13901200  | -3.08490500 |
| H | 2.22546500  | 2.59177500  | -1.41292600 |
| H | 3.75122500  | 2.27520000  | -2.26678600 |
| H | 2.40060700  | 3.01963700  | -3.11495200 |
| H | 2.34014100  | -0.34179600 | -4.61080000 |
| H | 2.67559700  | 1.37097200  | -4.84581800 |
| H | 3.86108600  | 0.35079800  | -4.02570700 |
| H | 0.50179100  | 1.95097100  | -3.81614600 |
| H | 0.10327900  | 0.26396600  | -3.49022600 |
| H | 0.07661100  | 1.43786300  | -2.17803000 |

**TS<sub>2/3</sub><sup>BCF</sup>**

|    |             |             |             |
|----|-------------|-------------|-------------|
| Ni | 0.84308300  | 0.01564600  | -0.70918600 |
| B  | -1.16251200 | -0.07650400 | -0.04237000 |
| C  | -2.49612800 | -0.63103600 | -0.76676300 |
| C  | -3.08300400 | 0.11138800  | -1.79456800 |
| C  | -3.21441200 | -1.76501500 | -0.38533300 |
| C  | -4.26608700 | -0.24267600 | -2.43005800 |
| C  | -4.40336900 | -2.15630800 | -0.99277100 |
| C  | -4.93223700 | -1.39365200 | -2.02659400 |
| C  | -0.33848600 | -1.11975500 | 0.85712500  |
| C  | 0.01229200  | -0.92768500 | 2.20395300  |
| C  | -0.02199500 | -2.39851200 | 0.35352900  |
| C  | 0.59070700  | -1.91494500 | 2.99315400  |
| C  | 0.57331000  | -3.39839900 | 1.10462600  |
| C  | 0.87654900  | -3.15680500 | 2.44191400  |
| C  | -1.48710200 | 1.37876800  | 0.58425800  |
| C  | -0.95296400 | 2.59064400  | 0.16665800  |
| C  | -2.45707000 | 1.47597200  | 1.58269900  |
| C  | -1.32111200 | 3.81920600  | 0.70603500  |
| C  | -2.85761400 | 2.67708900  | 2.15140600  |

|   |             |             |             |
|---|-------------|-------------|-------------|
| C | -2.27968400 | 3.86316500  | 1.70934000  |
| F | 1.46273700  | -4.09961600 | 3.17619600  |
| F | 0.89970200  | -1.67035700 | 4.27033600  |
| F | -0.23221400 | 0.23539100  | 2.82418600  |
| F | 0.85436400  | -4.58838000 | 0.56506700  |
| F | -0.35691400 | -2.72120400 | -0.90648000 |
| F | -2.79654900 | -2.53894200 | 0.63254200  |
| F | -5.04764400 | -3.25532200 | -0.58373400 |
| F | -6.07027200 | -1.75826000 | -2.62081300 |
| F | -4.76742100 | 0.50884000  | -3.41718700 |
| F | -2.49202900 | 1.24836100  | -2.21534200 |
| F | -3.04052400 | 0.35577300  | 2.04803700  |
| F | -3.78290000 | 2.70806400  | 3.11751400  |
| F | -2.64655300 | 5.03128700  | 2.24222200  |
| F | -0.76372200 | 4.95390500  | 0.26343900  |
| F | -0.03226500 | 2.62822000  | -0.81924100 |
| C | 0.25431200  | -0.16904800 | -2.62622200 |
| H | 0.68805300  | 0.69720400  | -3.11715800 |
| H | 0.84656400  | -1.07354100 | -2.77030400 |
| H | -0.73565700 | -0.35840800 | -3.04990200 |
| H | -0.47029300 | 0.04245900  | -1.44744200 |
| P | 3.10125100  | 0.33365400  | -0.74847200 |
| C | 3.69876600  | 0.34993800  | 1.06500300  |
| C | 2.71410400  | 1.22084600  | 1.86866600  |
| C | 3.57770700  | -1.07978900 | 1.60698400  |
| C | 5.12440700  | 0.84620500  | 1.32811000  |
| H | 2.89035800  | 2.28820100  | 1.74072900  |
| H | 1.67202900  | 1.02505400  | 1.59888200  |
| H | 2.82342400  | 0.99402200  | 2.93636600  |
| H | 4.36548900  | -1.73861800 | 1.23690600  |
| H | 3.66020400  | -1.05527100 | 2.70041600  |
| H | 2.61249900  | -1.52200400 | 1.35495000  |
| H | 5.33521500  | 0.73893900  | 2.40070700  |
| H | 5.87865800  | 0.27105200  | 0.78706800  |
| H | 5.25468600  | 1.90188000  | 1.08125400  |
| C | 3.97306900  | -1.09649900 | -1.67621900 |
| C | 5.46056000  | -1.28125200 | -1.35196000 |
| C | 3.22748500  | -2.40360400 | -1.35274100 |
| C | 3.83468000  | -0.89289300 | -3.19404100 |
| H | 6.04990800  | -0.38312800 | -1.54646300 |
| H | 5.62868900  | -1.58453100 | -0.31650000 |
| H | 5.85898900  | -2.08192000 | -1.98925400 |
| H | 2.16285600  | -2.33063000 | -1.59073200 |
| H | 3.65144800  | -3.20968600 | -1.96534200 |

|   |            |             |             |
|---|------------|-------------|-------------|
| H | 3.31885100 | -2.70554100 | -0.30996000 |
| H | 4.19972700 | -1.79945900 | -3.69329600 |
| H | 2.79670200 | -0.74828000 | -3.50338300 |
| H | 4.42854000 | -0.05815300 | -3.56974700 |
| C | 3.63927300 | 1.98838300  | -1.54379100 |
| C | 3.29200500 | 3.15310300  | -0.60314200 |
| C | 5.13243000 | 2.07886200  | -1.88558500 |
| C | 2.81186800 | 2.23024400  | -2.81667700 |
| H | 2.25950300 | 3.10323800  | -0.25034300 |
| H | 3.96198300 | 3.21861100  | 0.25582000  |
| H | 3.40085400 | 4.08833000  | -1.16719100 |
| H | 5.42313200 | 1.40219600  | -2.69169300 |
| H | 5.34686700 | 3.09940100  | -2.22967700 |
| H | 5.77520200 | 1.88213200  | -1.02523100 |
| H | 3.16991300 | 3.15332500  | -3.29084700 |
| H | 2.89176000 | 1.43205800  | -3.55486300 |
| H | 1.75761000 | 2.37518400  | -2.57028100 |

### 3<sup>BCF</sup>

|    |            |             |             |
|----|------------|-------------|-------------|
| Ni | 1.14321700 | 0.12354500  | -0.76184700 |
| P  | 3.31953200 | 0.29599000  | -0.74862100 |
| C  | 3.34315300 | 1.85512700  | 0.34345900  |
| C  | 4.28414800 | 0.62305300  | -2.35599300 |
| C  | 4.08360500 | -1.17989700 | 0.17225200  |
| C  | 3.05363400 | 3.11191000  | -0.49146600 |
| H  | 2.14857300 | 3.00496300  | -1.09545000 |
| H  | 2.88368000 | 3.94380600  | 0.20347900  |
| H  | 3.88274800 | 3.39867300  | -1.13989600 |
| C  | 2.12197900 | 1.68109900  | 1.26356000  |
| H  | 1.18203700 | 1.55530300  | 0.68708100  |
| H  | 2.21297200 | 0.85904400  | 1.96898700  |
| H  | 1.95433900 | 2.59983700  | 1.83911500  |
| C  | 4.60591200 | 2.08783200  | 1.17455600  |
| H  | 5.48946300 | 2.22924600  | 0.54711300  |
| H  | 4.47209400 | 3.00126200  | 1.76891300  |
| H  | 4.80994800 | 1.27434100  | 1.87309300  |
| C  | 3.40460100 | 1.45748600  | -3.30204600 |
| H  | 3.14374100 | 2.43538400  | -2.90029400 |
| H  | 3.96284800 | 1.62236700  | -4.23235800 |
| H  | 2.47947800 | 0.93559200  | -3.55350300 |
| C  | 5.60414700 | 1.36353200  | -2.09177900 |
| H  | 6.13226000 | 1.47650200  | -3.04718200 |
| H  | 5.45333000 | 2.36598200  | -1.68855400 |
| H  | 6.26423600 | 0.81736600  | -1.41442400 |

|   |             |             |             |
|---|-------------|-------------|-------------|
| C | 4.61995700  | -0.67835400 | -3.10258600 |
| H | 3.73373000  | -1.26885400 | -3.34434100 |
| H | 5.09158400  | -0.40059500 | -4.05339700 |
| H | 5.32951500  | -1.31061000 | -2.56653800 |
| C | 5.61410000  | -1.16569100 | 0.25444600  |
| H | 5.93600100  | -2.01943900 | 0.86456700  |
| H | 6.09224200  | -1.27086800 | -0.72140800 |
| H | 5.99728900  | -0.25904100 | 0.72986000  |
| C | 3.51701200  | -1.24009500 | 1.59619300  |
| H | 3.82280100  | -2.19183800 | 2.04725500  |
| H | 3.88356800  | -0.44260600 | 2.24505000  |
| H | 2.42575500  | -1.22017300 | 1.59097500  |
| C | 3.59741100  | -2.46205100 | -0.52716900 |
| H | 3.95411900  | -2.56253100 | -1.55203100 |
| H | 3.96934000  | -3.32585700 | 0.03783300  |
| H | 2.50505500  | -2.51441600 | -0.53987200 |
| B | -1.17783400 | -0.00751100 | -0.05889500 |
| C | -2.31092600 | -0.80660000 | -0.90647200 |
| C | -2.61677500 | -0.38311400 | -2.19999400 |
| C | -3.09208100 | -1.86102500 | -0.43737500 |
| C | -3.59675200 | -0.96609400 | -2.99400100 |
| C | -4.08419800 | -2.47421300 | -1.19638200 |
| C | -4.33757800 | -2.02644800 | -2.48658900 |
| C | -0.43859900 | -0.88578300 | 1.10005700  |
| C | -0.17373500 | -0.41446900 | 2.39103000  |
| C | -0.10059800 | -2.23399600 | 0.91010300  |
| C | 0.35556800  | -1.19985000 | 3.41112000  |
| C | 0.42723000  | -3.05222800 | 1.89958400  |
| C | 0.65560900  | -2.53275300 | 3.16783900  |
| C | -1.82264000 | 1.40339000  | 0.42347700  |
| C | -1.42517000 | 2.64680300  | -0.05625500 |
| C | -2.90054800 | 1.43214800  | 1.30647800  |
| C | -2.03151200 | 3.84308500  | 0.31615800  |
| C | -3.53888900 | 2.59862700  | 1.70531300  |
| C | -3.09805900 | 3.81939700  | 1.20430400  |
| F | 1.18282700  | -3.29532700 | 4.12719600  |
| F | 0.59245500  | -0.67451100 | 4.61898000  |
| F | -0.41848900 | 0.86599500  | 2.72535900  |
| F | 0.72924800  | -4.32947300 | 1.64009600  |
| F | -0.30776000 | -2.82440000 | -0.27965600 |
| F | -2.91800100 | -2.34954500 | 0.80438300  |
| F | -4.79834000 | -3.48974800 | -0.69440800 |
| F | -5.28691900 | -2.60381100 | -3.22870800 |
| F | -3.83704500 | -0.51575200 | -4.23251900 |

|   |             |             |             |
|---|-------------|-------------|-------------|
| F | -1.95237900 | 0.65960900  | -2.73884700 |
| F | -3.35567700 | 0.27933800  | 1.83046600  |
| F | -4.56409700 | 2.56456300  | 2.56529500  |
| F | -3.69530300 | 4.95603400  | 1.57402400  |
| F | -1.59719800 | 5.01213700  | -0.17448200 |
| F | -0.39549000 | 2.75583900  | -0.92549100 |
| H | -0.41390100 | 0.36161800  | -0.99830300 |
| C | 0.97581900  | -0.85555300 | -2.36422700 |
| H | 0.20550900  | -1.60162100 | -2.15848400 |
| H | 0.61797600  | -0.14141300 | -3.11182400 |
| H | 1.88833700  | -1.34317300 | -2.70071500 |

**2**

|    |             |            |             |
|----|-------------|------------|-------------|
| Ni | -1.43614600 | 0.38981500 | 0.73720400  |
| P  | -0.99455900 | 2.58326200 | 0.39789200  |
| C  | -2.55158900 | 3.47174000 | 1.05983900  |
| C  | -0.72139900 | 3.07762100 | -1.42449100 |
| C  | 0.52038400  | 3.11910600 | 1.41454700  |
| C  | -3.70254100 | 3.33851900 | 0.05097600  |
| H  | -3.88607200 | 2.29604600 | -0.22300000 |
| H  | -4.61659900 | 3.71649700 | 0.52689000  |
| H  | -3.54966700 | 3.91919900 | -0.86014300 |
| C  | -3.01867400 | 2.70963100 | 2.31363300  |
| H  | -3.27662200 | 1.67278000 | 2.06575900  |
| H  | -2.28482000 | 2.69244100 | 3.11874800  |
| H  | -3.92691000 | 3.18964700 | 2.70118000  |
| C  | -2.36065100 | 4.95334600 | 1.40121600  |
| H  | -2.01533700 | 5.53808000 | 0.54574900  |
| H  | -3.32658700 | 5.36888300 | 1.71781300  |
| H  | -1.65970600 | 5.10541100 | 2.22484700  |
| C  | -1.65644600 | 2.21773400 | -2.29133900 |
| H  | -2.71233500 | 2.32519300 | -2.04596800 |
| H  | -1.52648500 | 2.51188400 | -3.34102500 |
| H  | -1.38655900 | 1.16065700 | -2.21253000 |
| C  | -0.95126500 | 4.56439600 | -1.72144000 |
| H  | -0.69705700 | 4.74916200 | -2.77352400 |
| H  | -1.98945400 | 4.87262200 | -1.58274100 |
| H  | -0.31641000 | 5.21286800 | -1.11326300 |
| C  | 0.70214800  | 2.71605100 | -1.86858800 |
| H  | 0.95206900  | 1.67913300 | -1.64306000 |
| H  | 0.75550900  | 2.83200800 | -2.95808400 |
| H  | 1.46768300  | 3.36644600 | -1.44531700 |
| C  | 1.05620700  | 4.52057400 | 1.10213700  |
| H  | 1.89838800  | 4.72688200 | 1.77598200  |



|   |             |             |             |
|---|-------------|-------------|-------------|
| H | 1.43623200  | 4.60597300  | 0.08285700  |
| H | 0.30904900  | 5.30187700  | 1.26048600  |
| C | 0.19851900  | 3.03644300  | 2.91216900  |
| H | 1.13244400  | 3.18749000  | 3.46838600  |
| H | -0.50409200 | 3.80235900  | 3.24691500  |
| H | -0.18791500 | 2.05384900  | 3.19141700  |
| C | 1.61737100  | 2.07717500  | 1.15587400  |
| H | 1.99223200  | 2.09142600  | 0.13701400  |
| H | 2.46883600  | 2.28478700  | 1.81626000  |
| H | 1.25725800  | 1.06788200  | 1.36952100  |
| B | -1.04249800 | -1.62203300 | -0.13430400 |
| C | 0.49344900  | -1.95646200 | -0.28325000 |
| C | 1.26893600  | -1.43890200 | -1.31994400 |
| C | 1.11023500  | -2.94609400 | 0.48643900  |
| C | 2.56255800  | -1.85850700 | -1.59112500 |
| C | 2.39445300  | -3.41205800 | 0.23322100  |
| C | 3.12644600  | -2.86282000 | -0.81280000 |
| C | -1.72177800 | -1.48437100 | 1.24189800  |
| C | -3.08307300 | -1.80618700 | 1.53182500  |
| C | -1.01187200 | -0.74333100 | 2.26498500  |
| C | -3.70186800 | -1.45033000 | 2.69787100  |
| C | -1.66523900 | -0.42430600 | 3.49472200  |
| C | -2.98293900 | -0.73019100 | 3.68410000  |
| C | -1.92203000 | -1.74670500 | -1.45502500 |
| C | -3.03033000 | -0.93954600 | -1.71745700 |
| C | -1.63145400 | -2.67410700 | -2.46207100 |
| C | -3.77973400 | -0.99815400 | -2.88192000 |
| C | -2.36041200 | -2.77605800 | -3.64203400 |
| C | -3.43865200 | -1.92668100 | -3.85903500 |
| F | -3.61480000 | -0.37621200 | 4.80559300  |
| F | -4.97309600 | -1.78576500 | 2.95240000  |
| F | -3.78306900 | -2.54327900 | 0.65526200  |
| F | -0.97250600 | 0.18885000  | 4.46419600  |
| F | 0.34806700  | -0.85830200 | 2.40382900  |
| F | 0.43816000  | -3.54685600 | 1.48163100  |
| F | 2.91987500  | -4.39939900 | 0.96409700  |
| F | 4.35294500  | -3.30791100 | -1.08448300 |
| F | 3.25393600  | -1.34285400 | -2.61437200 |
| F | 0.74191600  | -0.51877800 | -2.15077500 |
| F | -0.62430400 | -3.54991600 | -2.31626400 |
| F | -2.03677600 | -3.68505500 | -4.56645600 |
| F | -4.14282200 | -2.00540700 | -4.98740700 |
| F | -4.81667100 | -0.17569400 | -3.07245700 |
| F | -3.42623000 | -0.01872300 | -0.80914600 |

|   |            |             |             |
|---|------------|-------------|-------------|
| C | 4.42899000 | 1.17283700  | -0.46166100 |
| C | 4.53664600 | 0.26164800  | 0.33743900  |
| C | 4.25615500 | 2.27926100  | -1.34180600 |
| C | 4.06830800 | 2.08580200  | -2.72159100 |
| C | 4.23966900 | 3.58838900  | -0.82507900 |
| C | 3.86684200 | 3.17847000  | -3.56014600 |
| H | 4.07109600 | 1.07660600  | -3.12004700 |
| C | 4.03566500 | 4.67465500  | -1.67064500 |
| H | 4.38037500 | 3.73765800  | 0.24124600  |
| C | 3.84744800 | 4.47405900  | -3.03997500 |
| H | 3.71799900 | 3.01679900  | -4.62456400 |
| H | 4.02177800 | 5.68070100  | -1.25930200 |
| H | 3.68543600 | 5.32362700  | -3.69809500 |
| C | 4.63286000 | -0.78800000 | 1.29595500  |
| C | 5.72362100 | -1.67466400 | 1.28892900  |
| C | 3.62542200 | -0.94694100 | 2.26444900  |
| C | 5.80168700 | -2.69357600 | 2.23404000  |
| H | 6.49759900 | -1.55951200 | 0.53600600  |
| C | 3.70972100 | -1.96983000 | 3.20288200  |
| H | 2.77858400 | -0.27158200 | 2.26511100  |
| C | 4.79810500 | -2.84424400 | 3.19269300  |
| H | 6.64615300 | -3.37739800 | 2.21728300  |
| H | 2.91767000 | -2.08910600 | 3.93722500  |
| H | 4.85817600 | -3.64750400 | 3.92204200  |

### 3

|    |             |            |             |
|----|-------------|------------|-------------|
| Ni | -0.67112500 | 0.93024800 | 0.56793000  |
| P  | -0.11692800 | 2.80783900 | -0.56278100 |
| C  | 0.20051800  | 4.07194700 | 0.83785800  |
| C  | -1.46481700 | 3.51564200 | -1.71898000 |
| C  | 1.47640300  | 2.55070400 | -1.56866400 |
| C  | -1.14088000 | 4.53261500 | 1.43025900  |
| H  | -1.76479700 | 3.68346800 | 1.72769700  |
| H  | -0.92986400 | 5.11470100 | 2.33665800  |
| H  | -1.71821500 | 5.17367700 | 0.76258000  |
| C  | 0.91021900  | 3.33167500 | 1.98521400  |
| H  | 0.26699300  | 2.54485400 | 2.39607400  |
| H  | 1.86029000  | 2.88199900 | 1.70107400  |
| H  | 1.10743100  | 4.04616900 | 2.79534700  |
| C  | 1.03003600  | 5.29848100 | 0.44369800  |
| H  | 0.59319500  | 5.85675600 | -0.38663400 |
| H  | 1.08489300  | 5.97655300 | 1.30584000  |
| H  | 2.05588500  | 5.03350700 | 0.17734900  |
| C  | -2.83268800 | 3.20562600 | -1.08854800 |

|   |             |             |             |
|---|-------------|-------------|-------------|
| H | -2.95854100 | 3.60751400  | -0.08379600 |
| H | -3.61843900 | 3.63799000  | -1.72175900 |
| H | -2.99868100 | 2.12496600  | -1.05092500 |
| C | -1.33951300 | 5.01892100  | -1.99650700 |
| H | -2.11671200 | 5.30225300  | -2.71859500 |
| H | -1.48896700 | 5.63387600  | -1.10764200 |
| H | -0.37374700 | 5.28006600  | -2.43614900 |
| C | -1.45887100 | 2.78840200  | -3.07100500 |
| H | -1.50485700 | 1.70631500  | -2.95398700 |
| H | -2.35785700 | 3.09609700  | -3.62092600 |
| H | -0.59949100 | 3.04438700  | -3.69278100 |
| C | 1.85494600  | 3.70727900  | -2.50134600 |
| H | 2.80805100  | 3.45940500  | -2.98664400 |
| H | 1.12295200  | 3.87200500  | -3.29404500 |
| H | 1.99605200  | 4.64839400  | -1.96524600 |
| C | 2.65003800  | 2.30345200  | -0.61378900 |
| H | 3.52268700  | 2.02386000  | -1.21369700 |
| H | 2.93127900  | 3.18769800  | -0.03921900 |
| H | 2.45615000  | 1.47784500  | 0.07327100  |
| C | 1.31541000  | 1.25596300  | -2.38499500 |
| H | 0.58529900  | 1.33803600  | -3.18964000 |
| H | 2.28393400  | 1.01672700  | -2.84100600 |
| H | 1.03421000  | 0.41556900  | -1.74533100 |
| B | -1.70127700 | -0.99902400 | 0.21479900  |
| C | -1.14430100 | -1.73076800 | -1.06564600 |
| C | -1.47549200 | -1.32747300 | -2.35717800 |
| C | -0.34574600 | -2.87366200 | -0.97865700 |
| C | -1.01395700 | -1.96452600 | -3.49986600 |
| C | 0.11960900  | -3.55402000 | -2.09672600 |
| C | -0.20781700 | -3.08946200 | -3.36570200 |
| C | -0.82870700 | -0.81772200 | 1.47292800  |
| C | -1.31573900 | -0.79882300 | 2.81383200  |
| C | 0.54772700  | -0.40640500 | 1.28005700  |
| C | -0.55033600 | -0.41701400 | 3.87953800  |
| C | 1.33025200  | -0.02183400 | 2.41245400  |
| C | 0.78426200  | 0.00377400  | 3.66391100  |
| C | -3.26175800 | -0.70520000 | 0.27094500  |
| C | -3.81113600 | 0.41569100  | 0.89676500  |
| C | -4.19892400 | -1.55448300 | -0.32678500 |
| C | -5.16620900 | 0.70799200  | 0.91661300  |
| C | -5.56713300 | -1.30722900 | -0.32302100 |
| C | -6.05554400 | -0.16339600 | 0.29742900  |
| F | 1.50326800  | 0.41612100  | 4.71215600  |
| F | -1.01975700 | -0.44294600 | 5.13403700  |

|   |             |             |             |
|---|-------------|-------------|-------------|
| F | -2.56159900 | -1.23432600 | 3.06376900  |
| F | 2.60508400  | 0.34637800  | 2.24015300  |
| F | 1.30259500  | -0.90326600 | 0.25006600  |
| F | -0.03514200 | -3.38812100 | 0.21791000  |
| F | 0.87227000  | -4.65283800 | -1.97189700 |
| F | 0.24383200  | -3.72359300 | -4.44896900 |
| F | -1.34005900 | -1.51686500 | -4.71876400 |
| F | -2.29830900 | -0.27656900 | -2.53616600 |
| F | -3.80455900 | -2.69023400 | -0.92479700 |
| F | -6.41611800 | -2.15820700 | -0.90679200 |
| F | -7.36300500 | 0.09353200  | 0.30424800  |
| F | -5.62125200 | 1.81210700  | 1.51804000  |
| F | -3.00709100 | 1.30664600  | 1.52207600  |
| C | 4.94165500  | -0.86050400 | 0.30284200  |
| C | 4.38152500  | -1.84992900 | 0.73640200  |
| C | 5.51832500  | 0.34299700  | -0.18285800 |
| C | 5.86834100  | 0.48035800  | -1.53875500 |
| C | 5.70032300  | 1.43708200  | 0.68439200  |
| C | 6.37125700  | 1.68782500  | -2.01466400 |
| H | 5.73069200  | -0.36238500 | -2.20855900 |
| C | 6.20628500  | 2.63907300  | 0.20048900  |
| H | 5.42583200  | 1.33350600  | 1.72983800  |
| C | 6.53879500  | 2.77200400  | -1.14977600 |
| H | 6.63213600  | 1.78397600  | -3.06549800 |
| H | 6.33628200  | 3.47868200  | 0.87858000  |
| H | 6.92896000  | 3.71418900  | -1.52555500 |
| C | 3.66836900  | -2.96059800 | 1.26180300  |
| C | 3.39544400  | -4.08545800 | 0.46318100  |
| C | 3.19844900  | -2.93106300 | 2.58882900  |
| C | 2.66631900  | -5.15072500 | 0.98129900  |
| H | 3.74995900  | -4.10739700 | -0.56268200 |
| C | 2.46490500  | -3.99839900 | 3.09606100  |
| H | 3.41704100  | -2.06699300 | 3.20853200  |
| C | 2.19660400  | -5.11110900 | 2.29531900  |
| H | 2.45209000  | -6.01000800 | 0.35199000  |
| H | 2.10138100  | -3.96217700 | 4.11985300  |
| H | 1.61959300  | -5.94191500 | 2.69270100  |
| C | 3.08946400  | -1.94312200 | -2.96786200 |
| H | 3.09647100  | -1.63960000 | -1.91973300 |
| H | 3.99689100  | -1.58567900 | -3.45958700 |
| H | 2.21872400  | -1.51395700 | -3.46683300 |
| H | 3.04973500  | -3.03220300 | -3.03559400 |

**TS<sub>3/4</sub>**

|    |             |             |             |
|----|-------------|-------------|-------------|
| Ni | 1.19764800  | 0.11060100  | -0.19149200 |
| B  | -0.44735000 | -1.09477300 | 0.38131400  |
| C  | -2.03994400 | -0.89084500 | 0.19231600  |
| C  | -2.71967600 | 0.02787200  | 0.99698400  |
| C  | -2.86534800 | -1.69136800 | -0.59733000 |
| C  | -4.10071000 | 0.16212400  | 1.02382900  |
| C  | -4.25306700 | -1.59922400 | -0.59180700 |
| C  | -4.87823200 | -0.66837900 | 0.22660200  |
| C  | 0.34677600  | -1.88311000 | -0.76477500 |
| C  | 1.20644400  | -2.97380500 | -0.55004700 |
| C  | 0.14474600  | -1.56763900 | -2.12489400 |
| C  | 1.78435000  | -3.70950000 | -1.57901200 |
| C  | 0.71382700  | -2.26935300 | -3.17384100 |
| C  | 1.53747100  | -3.35831200 | -2.89875000 |
| C  | -0.18268600 | -1.52134300 | 1.91920400  |
| C  | 0.45193400  | -0.75094900 | 2.88486500  |
| C  | -0.71069900 | -2.72722400 | 2.38137300  |
| C  | 0.58203600  | -1.14087100 | 4.21419200  |
| C  | -0.60571500 | -3.15943100 | 3.69619000  |
| C  | 0.05094600  | -2.35643900 | 4.62359000  |
| F  | 2.10942700  | -4.03348300 | -3.89388900 |
| F  | 2.59224300  | -4.73953000 | -1.30753400 |
| F  | 1.48836200  | -3.39921300 | 0.69036600  |
| F  | 0.48395200  | -1.91477900 | -4.44250200 |
| F  | -0.68630700 | -0.56754800 | -2.46039100 |
| F  | -2.34642900 | -2.64687300 | -1.39143000 |
| F  | -4.99142800 | -2.41421200 | -1.35474200 |
| F  | -6.20950900 | -0.58784800 | 0.26541500  |
| F  | -4.68745500 | 1.06560000  | 1.81785600  |
| F  | -2.02296200 | 0.82393500  | 1.83401900  |
| F  | -1.34844700 | -3.54210800 | 1.52020400  |
| F  | -1.12073100 | -4.33373300 | 4.07988200  |
| F  | 0.16631000  | -2.75035600 | 5.89472900  |
| F  | 1.20922900  | -0.35355700 | 5.09860400  |
| F  | 0.97757500  | 0.44955300  | 2.56593400  |
| C  | -0.01765200 | 1.69745900  | -0.33907400 |
| H  | 0.44733100  | 2.44735400  | 0.29141000  |
| H  | 0.20839500  | 1.83578000  | -1.39664000 |
| H  | -1.09970100 | 1.77850700  | -0.23158200 |
| H  | -0.22835600 | 0.43637600  | 0.18675300  |
| P  | 3.28162700  | 0.94508000  | -0.56861000 |
| C  | 4.49322100  | -0.52878900 | -0.66824700 |
| C  | 4.16251900  | -1.48557800 | 0.49333800  |

|   |             |             |             |
|---|-------------|-------------|-------------|
| C | 4.19079700  | -1.28318600 | -1.96917500 |
| C | 5.99178200  | -0.21167200 | -0.62628800 |
| H | 4.58167100  | -1.15756100 | 1.44389700  |
| H | 3.08554700  | -1.61051400 | 0.63469900  |
| H | 4.58175500  | -2.47514400 | 0.27296100  |
| H | 4.56933500  | -0.76641600 | -2.85315100 |
| H | 4.67575300  | -2.26638500 | -1.93382200 |
| H | 3.11838200  | -1.44355000 | -2.09667000 |
| H | 6.54750400  | -1.15031400 | -0.75557100 |
| H | 6.30474100  | 0.46671800  | -1.42254600 |
| H | 6.30249400  | 0.21395300  | 0.33040100  |
| C | 3.33319400  | 1.90290600  | -2.22756100 |
| C | 4.72813400  | 2.08162900  | -2.83987100 |
| C | 2.44167300  | 1.16150500  | -3.24031800 |
| C | 2.71244600  | 3.29889600  | -2.04695900 |
| H | 5.42317500  | 2.58619000  | -2.16583300 |
| H | 5.17519800  | 1.13426200  | -3.14870000 |
| H | 4.63514400  | 2.70091200  | -3.74209100 |
| H | 1.42650700  | 1.01903900  | -2.86119300 |
| H | 2.37472400  | 1.76420700  | -4.15534900 |
| H | 2.83261700  | 0.18435700  | -3.52244500 |
| H | 2.60980700  | 3.75488200  | -3.04006600 |
| H | 1.71633500  | 3.26489900  | -1.60118600 |
| H | 3.33508600  | 3.96688700  | -1.44954300 |
| C | 3.90387600  | 2.10725200  | 0.81775900  |
| C | 4.23788000  | 1.27864600  | 2.06806400  |
| C | 5.13906100  | 2.93970700  | 0.44916600  |
| C | 2.76947000  | 3.05356700  | 1.23987100  |
| H | 3.43267300  | 0.58842700  | 2.33125600  |
| H | 5.17078200  | 0.72054500  | 1.96880700  |
| H | 4.36483300  | 1.97083100  | 2.91037200  |
| H | 4.92579800  | 3.69527000  | -0.30989500 |
| H | 5.47639600  | 3.47355000  | 1.34771600  |
| H | 5.97332100  | 2.32889100  | 0.09883700  |
| H | 3.16016900  | 3.74484700  | 1.99775100  |
| H | 2.36994100  | 3.65975200  | 0.42820100  |
| H | 1.94610400  | 2.50132400  | 1.69655600  |
| C | -2.54924700 | 3.80153100  | -0.20647500 |
| C | -3.32122900 | 3.11213900  | -0.84650100 |
| C | -1.55647300 | 4.51127500  | 0.52710800  |
| C | -1.48031900 | 4.39099800  | 1.92562500  |
| C | -0.58607000 | 5.27093800  | -0.15179800 |
| C | -0.45079100 | 5.01428400  | 2.62537800  |
| H | -2.22016300 | 3.79138400  | 2.44698900  |

|   |             |             |             |
|---|-------------|-------------|-------------|
| C | 0.43749300  | 5.89283400  | 0.55648600  |
| H | -0.64051600 | 5.35525300  | -1.23336700 |
| C | 0.51005600  | 5.76504300  | 1.94533700  |
| H | -0.39432600 | 4.90715200  | 3.70541500  |
| H | 1.18547200  | 6.47338400  | 0.02258600  |
| H | 1.31545500  | 6.24487800  | 2.49495800  |
| C | -4.11717500 | 2.22393100  | -1.62422300 |
| C | -5.51927500 | 2.21776400  | -1.53306000 |
| C | -3.47807300 | 1.31463700  | -2.48709600 |
| C | -6.26226400 | 1.31882800  | -2.29301400 |
| H | -6.01254800 | 2.91189200  | -0.85911700 |
| C | -4.22876500 | 0.41611700  | -3.23724900 |
| H | -2.39515400 | 1.31407500  | -2.54809800 |
| C | -5.62206600 | 0.41600300  | -3.14409500 |
| H | -7.34556300 | 1.31361300  | -2.21028800 |
| H | -3.72416800 | -0.29332100 | -3.88767200 |
| H | -6.20616200 | -0.29318800 | -3.72395300 |

**4**

|    |             |             |             |
|----|-------------|-------------|-------------|
| Ni | 1.33948800  | 0.20555100  | -0.25736200 |
| B  | -0.71405700 | -1.03059300 | 0.39661500  |
| C  | -2.27059700 | -0.69291700 | 0.05432200  |
| C  | -2.84804700 | 0.42909400  | 0.64906800  |
| C  | -3.15709900 | -1.47818700 | -0.67923000 |
| C  | -4.18813100 | 0.77258000  | 0.53228600  |
| C  | -4.50426200 | -1.16658100 | -0.83460600 |
| C  | -5.02732000 | -0.03550300 | -0.22298800 |
| C  | -0.00577900 | -2.13814500 | -0.56718400 |
| C  | 0.68582600  | -3.27031600 | -0.12639700 |
| C  | -0.10113000 | -2.04085800 | -1.96129400 |
| C  | 1.22836100  | -4.22747000 | -0.97942600 |
| C  | 0.44333000  | -2.95790000 | -2.84837400 |
| C  | 1.11576400  | -4.06929000 | -2.35281200 |
| C  | -0.65240500 | -1.33859500 | 1.99129000  |
| C  | -0.02980200 | -0.52488300 | 2.92966500  |
| C  | -1.35141400 | -2.41976600 | 2.52556300  |
| C  | -0.06376200 | -0.76399000 | 4.30003100  |
| C  | -1.41629000 | -2.70000400 | 3.88350200  |
| C  | -0.76160300 | -1.86277800 | 4.78194000  |
| F  | 1.65592500  | -4.96127900 | -3.18591700 |
| F  | 1.89346000  | -5.27811400 | -0.48365300 |
| F  | 0.90020000  | -3.49230900 | 1.18413600  |
| F  | 0.31788200  | -2.78962100 | -4.17010300 |
| F  | -0.78478600 | -1.02495600 | -2.51733100 |

|   |             |             |             |
|---|-------------|-------------|-------------|
| F | -2.74962000 | -2.61861100 | -1.27018900 |
| F | -5.30528400 | -1.95399000 | -1.56555100 |
| F | -6.32314200 | 0.26235500  | -0.34884200 |
| F | -4.67584000 | 1.85815700  | 1.14464400  |
| F | -2.09035600 | 1.23192800  | 1.42286100  |
| F | -1.99576000 | -3.26284500 | 1.69756000  |
| F | -2.09219900 | -3.76241700 | 4.33768100  |
| F | -0.80722400 | -2.11273300 | 6.09384900  |
| F | 0.56614900  | 0.05619300  | 5.15342900  |
| F | 0.65725900  | 0.57448400  | 2.54298700  |
| C | 0.64848300  | 1.50710100  | -1.42251500 |
| H | 1.34867500  | 2.25135200  | -1.79080100 |
| H | 0.23743500  | 0.93050200  | -2.25386300 |
| H | -0.14988100 | 2.00180100  | -0.86713700 |
| H | -0.19829800 | 0.11554500  | 0.26406500  |
| P | 3.42200100  | 0.63430700  | -0.69052900 |
| C | 4.08590900  | -0.90108200 | 0.21652900  |
| C | 3.09447600  | -1.09256700 | 1.37964200  |
| C | 3.93850800  | -2.14645900 | -0.66729400 |
| C | 5.51999000  | -0.83814700 | 0.74285100  |
| H | 3.11075500  | -0.29458000 | 2.11779400  |
| H | 2.05153200  | -1.21097500 | 1.02143800  |
| H | 3.30296600  | -2.03904100 | 1.89335100  |
| H | 4.66921100  | -2.19250600 | -1.47580400 |
| H | 4.09063000  | -3.03274900 | -0.03932000 |
| H | 2.93805300  | -2.21988800 | -1.09732500 |
| H | 5.75343300  | -1.79105900 | 1.23596200  |
| H | 6.24523600  | -0.69806100 | -0.06323000 |
| H | 5.66812400  | -0.04695500 | 1.47994400  |
| C | 4.00391200  | 0.62462400  | -2.50282100 |
| C | 5.48143000  | 0.22855900  | -2.64047100 |
| C | 3.11904600  | -0.35945600 | -3.28639900 |
| C | 3.82815200  | 1.99805600  | -3.17021800 |
| H | 6.14704700  | 0.91449900  | -2.11176400 |
| H | 5.68723700  | -0.78365300 | -2.29051500 |
| H | 5.74962000  | 0.26262300  | -3.70415700 |
| H | 2.06192300  | -0.09409900 | -3.20611000 |
| H | 3.39971700  | -0.31106100 | -4.34598500 |
| H | 3.23659100  | -1.39385900 | -2.96625100 |
| H | 4.10873600  | 1.89048700  | -4.22543200 |
| H | 2.79426800  | 2.34876200  | -3.14620200 |
| H | 4.47499100  | 2.76649900  | -2.74347100 |
| C | 4.01775900  | 2.21275300  | 0.18563700  |
| C | 3.77599000  | 2.08288400  | 1.69720400  |



|   |             |            |             |
|---|-------------|------------|-------------|
| C | 5.49855800  | 2.52751300 | -0.06214400 |
| C | 3.15809700  | 3.40627000 | -0.26319000 |
| H | 2.73413800  | 1.83839400 | 1.92050000  |
| H | 4.42935800  | 1.35446900 | 2.18143900  |
| H | 3.98267100  | 3.05818400 | 2.15410300  |
| H | 5.69672500  | 2.80611800 | -1.09967600 |
| H | 5.77654700  | 3.38761000 | 0.56047300  |
| H | 6.16034600  | 1.70046000 | 0.20461200  |
| H | 3.52650000  | 4.29952300 | 0.25465100  |
| H | 3.20423900  | 3.60724800 | -1.33296200 |
| H | 2.11348800  | 3.27468900 | 0.02421800  |
| C | -1.50222700 | 4.03573000 | -0.32556000 |
| C | -2.35232600 | 3.52310700 | -1.02952600 |
| C | -0.48189300 | 4.55501600 | 0.52356500  |
| C | -0.06574800 | 3.81786400 | 1.64809000  |
| C | 0.13289700  | 5.78961600 | 0.24886300  |
| C | 0.92979100  | 4.31555200 | 2.48307300  |
| H | -0.52939700 | 2.86115200 | 1.85492800  |
| C | 1.13228900  | 6.27651200 | 1.08744500  |
| H | -0.18196900 | 6.35783700 | -0.62172300 |
| C | 1.53110700  | 5.54478900 | 2.20813700  |
| H | 1.23776200  | 3.73708500 | 3.34992800  |
| H | 1.59996400  | 7.23253200 | 0.86628800  |
| H | 2.30868700  | 5.93057900 | 2.86242600  |
| C | -3.31086300 | 2.84960100 | -1.84146000 |
| C | -4.63735800 | 3.30590000 | -1.92734000 |
| C | -2.93888600 | 1.68527200 | -2.53743000 |
| C | -5.56832500 | 2.60590000 | -2.69001800 |
| H | -4.92985600 | 4.19715500 | -1.38014700 |
| C | -3.87548800 | 0.99214800 | -3.29624000 |
| H | -1.92067300 | 1.32422900 | -2.45869800 |
| C | -5.19268500 | 1.44890000 | -3.37525700 |
| H | -6.59492000 | 2.95861300 | -2.74017800 |
| H | -3.57820400 | 0.08574100 | -3.81690200 |
| H | -5.92616900 | 0.89887500 | -3.95855500 |

**5**

|    |             |             |             |
|----|-------------|-------------|-------------|
| Ni | 2.59295300  | -0.06835300 | 1.05374700  |
| B  | -1.99969000 | 0.08781400  | -0.45232300 |
| C  | -2.78306400 | 1.07380600  | 0.58437200  |
| C  | -2.65344100 | 0.88479800  | 1.96118800  |
| C  | -3.46126200 | 2.24335000  | 0.24457900  |
| C  | -3.11566900 | 1.76555700  | 2.92779800  |
| C  | -3.92976900 | 3.16868100  | 1.17590300  |

|   |             |             |             |
|---|-------------|-------------|-------------|
| C | -3.75101400 | 2.93464200  | 2.53063400  |
| C | -2.19976300 | 0.45467000  | -2.02951900 |
| C | -2.99805000 | -0.25545500 | -2.92308600 |
| C | -1.49198900 | 1.50507400  | -2.60974100 |
| C | -3.06374700 | 0.01698700  | -4.28794900 |
| C | -1.52097400 | 1.81686700  | -3.96192100 |
| C | -2.31224400 | 1.05767300  | -4.81585000 |
| C | -2.19535500 | -1.51014000 | -0.21263500 |
| C | -1.24931500 | -2.38990400 | -0.73441700 |
| C | -3.25059200 | -2.13137000 | 0.44826500  |
| C | -1.32695700 | -3.77258000 | -0.63281500 |
| C | -3.35660400 | -3.50979500 | 0.60647600  |
| C | -2.38860100 | -4.34014300 | 0.05775900  |
| F | -2.35629400 | 1.33454100  | -6.12556700 |
| F | -3.84556000 | -0.71324700 | -5.09737000 |
| F | -3.78394400 | -1.26382400 | -2.49246800 |
| F | -0.80053100 | 2.84018800  | -4.45179700 |
| F | -0.73726100 | 2.32012800  | -1.83574000 |
| F | -3.70472300 | 2.56175600  | -1.04497900 |
| F | -4.55113800 | 4.28876500  | 0.77284100  |
| F | -4.18960300 | 3.81484000  | 3.44076100  |
| F | -2.94989000 | 1.50593400  | 4.23483300  |
| F | -2.03047000 | -0.21836400 | 2.42974100  |
| F | -4.26542900 | -1.40051000 | 0.95452300  |
| F | -4.38782500 | -4.04939900 | 1.27687200  |
| F | -2.47798400 | -5.67056300 | 0.19350900  |
| F | -0.39425800 | -4.56100800 | -1.19247600 |
| F | -0.18456400 | -1.90951900 | -1.41750400 |
| C | 0.99107100  | -0.99485700 | 1.86140200  |
| C | 0.79499400  | 0.22895900  | 1.98415600  |
| C | 0.78957000  | -2.41193400 | 1.94951700  |
| C | 1.67333100  | -3.31793900 | 1.34564500  |
| C | -0.31829500 | -2.89341900 | 2.66889700  |
| C | 1.45101800  | -4.68661300 | 1.45382200  |
| H | 2.52876700  | -2.94315700 | 0.79276200  |
| C | -0.53321900 | -4.26318700 | 2.76933500  |
| H | -1.00476200 | -2.19026300 | 3.12529200  |
| C | 0.34800700  | -5.16212200 | 2.16431300  |
| H | 2.13205800  | -5.38289900 | 0.97282000  |
| H | -1.39875400 | -4.63076500 | 3.31344300  |
| H | 0.16737500  | -6.23084400 | 2.23648600  |
| C | 0.45002800  | 1.57826000  | 2.29652400  |
| C | 0.10977700  | 2.48558300  | 1.27984800  |
| C | 0.39877600  | 1.98082300  | 3.64290400  |

|   |             |             |             |
|---|-------------|-------------|-------------|
| C | -0.29218800 | 3.77473900  | 1.60923500  |
| H | 0.10947900  | 2.15400300  | 0.24958900  |
| C | -0.00500800 | 3.27278100  | 3.96067200  |
| H | 0.64763900  | 1.26842900  | 4.42382600  |
| C | -0.35422700 | 4.16908200  | 2.94700500  |
| H | -0.57985700 | 4.46363200  | 0.82024600  |
| H | -0.06606100 | 3.57652000  | 5.00180200  |
| H | -0.68739400 | 5.17126400  | 3.20247400  |
| P | 4.19721700  | 0.39740500  | -0.41096900 |
| C | 3.19341600  | 0.06138800  | -1.99499100 |
| C | 5.76134300  | -0.68873500 | -0.39292600 |
| C | 4.66692400  | 2.23587500  | -0.29681300 |
| C | 3.06220200  | -1.45053600 | -2.23493000 |
| H | 2.65910700  | -1.97079700 | -1.36107900 |
| H | 2.34178900  | -1.59822000 | -3.04796900 |
| H | 3.99536100  | -1.92860600 | -2.53650200 |
| C | 1.76864300  | 0.55940200  | -1.70366200 |
| H | 1.31097500  | 0.06412800  | -0.83237900 |
| H | 1.69815100  | 1.63411800  | -1.56366700 |
| H | 1.11888300  | 0.29154500  | -2.54431400 |
| C | 3.71750800  | 0.73565300  | -3.26546700 |
| H | 4.73490600  | 0.42898700  | -3.51892900 |
| H | 3.06640000  | 0.44958900  | -4.10150500 |
| H | 3.69182100  | 1.82544600  | -3.19862500 |
| C | 5.34845300  | -2.10103000 | 0.05588200  |
| H | 4.63554900  | -2.57505000 | -0.61844700 |
| H | 6.24460400  | -2.73370900 | 0.08391300  |
| H | 4.91634100  | -2.08859000 | 1.06020300  |
| C | 6.44295400  | -0.75549300 | -1.76756400 |
| H | 7.34831700  | -1.36864400 | -1.67442100 |
| H | 5.81707000  | -1.22065900 | -2.52995600 |
| H | 6.74877900  | 0.22951500  | -2.12838900 |
| C | 6.81053900  | -0.19739600 | 0.61764600  |
| H | 6.43144400  | -0.15823100 | 1.64087000  |
| H | 7.63680100  | -0.91912400 | 0.61093200  |
| H | 7.23321000  | 0.77528100  | 0.36148400  |
| C | 5.81270800  | 2.63964600  | -1.23307200 |
| H | 5.96717900  | 3.72257400  | -1.14421900 |
| H | 6.75818800  | 2.15791400  | -0.97619000 |
| H | 5.59173700  | 2.42412500  | -2.28084800 |
| C | 3.44419800  | 3.11203800  | -0.60641800 |
| H | 3.70828700  | 4.15123000  | -0.37431000 |
| H | 3.14747800  | 3.08263500  | -1.65635900 |
| H | 2.58367500  | 2.85005700  | 0.01697800  |

|   |             |             |             |
|---|-------------|-------------|-------------|
| C | 5.04245400  | 2.54509900  | 1.16274900  |
| H | 5.89520800  | 1.97367100  | 1.52902300  |
| H | 5.30611500  | 3.60799700  | 1.23005300  |
| H | 4.19477000  | 2.36815700  | 1.83113700  |
| C | 3.65988100  | -0.23637400 | 2.59966700  |
| H | 3.53455900  | -1.27447700 | 2.92414500  |
| H | 3.20595600  | 0.44641300  | 3.32413000  |
| H | 4.70886700  | 0.00424700  | 2.45570800  |
| H | -0.82592800 | 0.29435700  | -0.21909600 |

**TS<sub>5/6</sub>**

|    |             |             |             |
|----|-------------|-------------|-------------|
| Ni | -2.46601000 | 1.03550700  | 0.59548100  |
| B  | 1.82908900  | -0.52565000 | -0.46766800 |
| C  | 2.81316000  | -0.61940000 | 0.83001000  |
| C  | 2.83155400  | 0.43228100  | 1.74654300  |
| C  | 3.57675600  | -1.71636400 | 1.22478900  |
| C  | 3.51287500  | 0.41930600  | 2.95402900  |
| C  | 4.25718400  | -1.79064500 | 2.43937700  |
| C  | 4.22246500  | -0.71754700 | 3.31734100  |
| C  | 1.82676400  | -1.84804600 | -1.41835800 |
| C  | 2.30533300  | -1.91620000 | -2.72412800 |
| C  | 1.24487300  | -3.02956500 | -0.96196200 |
| C  | 2.19161500  | -3.04702800 | -3.53132600 |
| C  | 1.11100000  | -4.18169700 | -1.72279300 |
| C  | 1.58404600  | -4.18928000 | -3.03000400 |
| C  | 1.95638800  | 0.84942600  | -1.32540900 |
| C  | 0.85905000  | 1.30207100  | -2.05280100 |
| C  | 3.07571100  | 1.67214100  | -1.40407100 |
| C  | 0.85105200  | 2.46786000  | -2.80718200 |
| C  | 3.10774500  | 2.86460000  | -2.11936700 |
| C  | 1.98557800  | 3.26673700  | -2.83163800 |
| F  | 1.46084900  | -5.28575200 | -3.78981300 |
| F  | 2.66582500  | -3.04448500 | -4.78669300 |
| F  | 2.93514100  | -0.86368200 | -3.28657800 |
| F  | 0.52899600  | -5.28238100 | -1.21705900 |
| F  | 0.78645100  | -3.10314000 | 0.30822600  |
| F  | 3.71295400  | -2.79792000 | 0.42879900  |
| F  | 4.95363100  | -2.89107800 | 2.76586600  |
| F  | 4.87238500  | -0.77003100 | 4.48850400  |
| F  | 3.49269500  | 1.48487900  | 3.77236200  |
| F  | 2.16016100  | 1.56860900  | 1.46419600  |
| F  | 4.22105900  | 1.32664700  | -0.77862700 |
| F  | 4.21073300  | 3.63066000  | -2.13591400 |
| F  | 2.00269000  | 4.40309100  | -3.54238100 |

|   |             |             |             |
|---|-------------|-------------|-------------|
| F | -0.23663500 | 2.82659200  | -3.51173300 |
| F | -0.28606800 | 0.57963800  | -2.07541100 |
| C | -1.18958700 | 2.31680400  | 1.01701800  |
| C | -0.92314300 | 1.18076800  | 1.61731000  |
| C | -0.57158500 | 3.48016300  | 0.39652600  |
| C | -1.16753800 | 4.08781000  | -0.71798100 |
| C | 0.62315900  | 4.00291200  | 0.91116800  |
| C | -0.57135100 | 5.19296300  | -1.31616300 |
| H | -2.08190100 | 3.67343000  | -1.13293300 |
| C | 1.22035400  | 5.10308900  | 0.30289300  |
| H | 1.08249800  | 3.53911900  | 1.77584300  |
| C | 0.62576700  | 5.70109100  | -0.80939500 |
| H | -1.02850400 | 5.64371400  | -2.19222200 |
| H | 2.15540200  | 5.49136000  | 0.69711300  |
| H | 1.09949300  | 6.55391500  | -1.28707400 |
| C | -0.33771800 | 0.40831500  | 2.65638900  |
| C | -0.11650100 | -0.97183300 | 2.49355500  |
| C | 0.06747500  | 1.04282700  | 3.85044400  |
| C | 0.50973800  | -1.70030000 | 3.49550700  |
| H | -0.38451500 | -1.44046600 | 1.55622600  |
| C | 0.68617800  | 0.30534200  | 4.84978000  |
| H | -0.09608300 | 2.11021200  | 3.96701900  |
| C | 0.91362500  | -1.06397800 | 4.67135300  |
| H | 0.70637100  | -2.75804400 | 3.34868900  |
| H | 1.01385500  | 0.79717400  | 5.76085900  |
| H | 1.42031200  | -1.63129900 | 5.44731600  |
| P | -4.02534700 | -0.58073300 | 0.14755200  |
| C | -4.53256300 | -1.49906300 | 1.74075800  |
| C | -3.37345500 | -1.82270000 | -1.13584700 |
| C | -5.55007500 | 0.32366900  | -0.57257000 |
| C | -3.45910700 | -2.52656600 | 2.12724700  |
| H | -2.46702400 | -2.07452200 | 2.19548100  |
| H | -3.70785300 | -2.91517300 | 3.12298300  |
| H | -3.41583900 | -3.38046600 | 1.44934700  |
| C | -4.55198100 | -0.47478700 | 2.88893100  |
| H | -3.55324400 | -0.05368900 | 3.04760200  |
| H | -5.25445000 | 0.34511700  | 2.73622700  |
| H | -4.84390300 | -0.99031500 | 3.81285600  |
| C | -5.88148400 | -2.22285900 | 1.65539200  |
| H | -5.90907100 | -2.95237100 | 0.84245100  |
| H | -6.04466800 | -2.76880500 | 2.59369200  |
| H | -6.72388300 | -1.53957600 | 1.53102100  |
| C | -1.93706800 | -2.19198600 | -0.73857400 |
| H | -1.87318700 | -2.74579800 | 0.19588700  |

|   |             |             |             |
|---|-------------|-------------|-------------|
| H | -1.51942900 | -2.83305300 | -1.52379700 |
| H | -1.29413200 | -1.30933100 | -0.66630100 |
| C | -4.20663300 | -3.10047100 | -1.28718100 |
| H | -3.76434400 | -3.71003000 | -2.08563700 |
| H | -4.20424100 | -3.71062000 | -0.38125500 |
| H | -5.24443600 | -2.89985200 | -1.56249000 |
| C | -3.26208900 | -1.13319800 | -2.50410000 |
| H | -2.70787000 | -0.19165200 | -2.44413000 |
| H | -2.69790400 | -1.79654000 | -3.17112700 |
| H | -4.23136400 | -0.95361200 | -2.97384600 |
| C | -6.55341000 | -0.57847800 | -1.30043500 |
| H | -7.40957500 | 0.03250400  | -1.61563600 |
| H | -6.13094200 | -1.02784400 | -2.20153100 |
| H | -6.93693000 | -1.37945800 | -0.66500400 |
| C | -6.28756900 | 1.07752800  | 0.54427100  |
| H | -7.06525100 | 1.69809400  | 0.08152600  |
| H | -6.78447800 | 0.41508900  | 1.25455600  |
| H | -5.62441700 | 1.74845100  | 1.09751300  |
| C | -5.04832300 | 1.40202900  | -1.55125300 |
| H | -4.56059100 | 0.99574100  | -2.43548700 |
| H | -5.90731800 | 1.99570900  | -1.88931700 |
| H | -4.34678800 | 2.09297700  | -1.07051800 |
| C | -3.03856500 | 2.74918500  | 1.51819100  |
| H | -3.58177800 | 2.17446400  | 2.27184100  |
| H | -3.67001200 | 3.09738000  | 0.69717100  |
| H | -2.56873500 | 3.60252600  | 2.00396400  |
| H | 0.71375200  | -0.47579700 | 0.01131700  |

## 6

|    |             |             |             |
|----|-------------|-------------|-------------|
| Ni | 1.70128100  | -0.66696800 | -0.12317000 |
| B  | -1.52012800 | 0.61939500  | -0.17091300 |
| C  | -2.96882200 | 0.66877800  | 0.56499600  |
| C  | -3.22871800 | 0.14203000  | 1.82396500  |
| C  | -4.04728900 | 1.32596200  | -0.02472200 |
| C  | -4.46447500 | 0.23698900  | 2.45868100  |
| C  | -5.29728900 | 1.44943500  | 0.56676100  |
| C  | -5.50880600 | 0.89598700  | 1.82506500  |
| C  | -1.06388500 | 2.16751700  | -0.42498300 |
| C  | -0.90299100 | 2.82065100  | -1.64439500 |
| C  | -0.83966200 | 2.97279300  | 0.69239000  |
| C  | -0.51444100 | 4.15313600  | -1.76015600 |
| C  | -0.45918000 | 4.30695300  | 0.62758000  |
| C  | -0.28789500 | 4.90423300  | -0.61505800 |
| C  | -1.47647700 | -0.34061600 | -1.48581400 |

|   |             |             |             |
|---|-------------|-------------|-------------|
| C | -0.28886400 | -0.46880400 | -2.19018800 |
| C | -2.49107800 | -1.17384600 | -1.95763300 |
| C | -0.07121500 | -1.30745800 | -3.27003700 |
| C | -2.32907400 | -2.05451100 | -3.02494900 |
| C | -1.11190800 | -2.12670500 | -3.68783000 |
| F | 0.09599400  | 6.18356600  | -0.70560800 |
| F | -0.35846300 | 4.71925500  | -2.96591900 |
| F | -1.13064700 | 2.17917500  | -2.80858600 |
| F | -0.23910200 | 5.01779200  | 1.74476500  |
| F | -0.99460600 | 2.45780500  | 1.93060100  |
| F | -3.90564000 | 1.86409900  | -1.25327200 |
| F | -6.29994400 | 2.08495600  | -0.05707100 |
| F | -6.70418300 | 1.00007000  | 2.41817700  |
| F | -4.65384700 | -0.29568700 | 3.67637100  |
| F | -2.26484800 | -0.50217400 | 2.51490000  |
| F | -3.71073000 | -1.17711900 | -1.39330300 |
| F | -3.34267900 | -2.82877900 | -3.42808800 |
| F | -0.94062100 | -2.96890800 | -4.71246400 |
| F | 1.11079000  | -1.34289400 | -3.90649800 |
| F | 0.79474200  | 0.30143400  | -1.80498700 |
| C | 0.99582900  | -2.82216300 | -0.11516400 |
| C | 1.32974700  | -2.01629600 | 0.95206100  |
| C | -0.34189700 | -3.45088300 | -0.20496200 |
| C | -0.58020700 | -4.51723600 | -1.08772200 |
| C | -1.42079000 | -2.95832500 | 0.54906600  |
| C | -1.85017400 | -5.08149500 | -1.19715000 |
| H | 0.22403200  | -4.91601000 | -1.69775700 |
| C | -2.68328000 | -3.52752400 | 0.44652600  |
| H | -1.27748300 | -2.10037900 | 1.19315200  |
| C | -2.90611500 | -4.59234500 | -0.42918600 |
| H | -2.01402500 | -5.90075800 | -1.89225100 |
| H | -3.50319200 | -3.11549700 | 1.02804700  |
| H | -3.89875600 | -5.02354700 | -0.52609800 |
| C | 1.00027300  | -2.11667600 | 2.35301900  |
| C | 0.61979900  | -1.00099000 | 3.11914800  |
| C | 1.09381800  | -3.37626000 | 2.97834900  |
| C | 0.33582300  | -1.14105500 | 4.47101000  |
| H | 0.51087300  | -0.03948500 | 2.63327000  |
| C | 0.82278800  | -3.51038500 | 4.33492700  |
| H | 1.38043500  | -4.23870900 | 2.38261600  |
| C | 0.44362300  | -2.39271200 | 5.08392300  |
| H | 0.01874400  | -0.27630300 | 5.04712400  |
| H | 0.89947900  | -4.48495100 | 4.80941200  |
| H | 0.22431000  | -2.49873500 | 6.14304300  |

|   |            |             |             |
|---|------------|-------------|-------------|
| P | 3.67224400 | 0.28690900  | 0.21263800  |
| C | 4.72983000 | -0.61840900 | 1.51670100  |
| C | 3.30876700 | 2.06432600  | 0.80231900  |
| C | 4.66752500 | 0.36970600  | -1.42359800 |
| C | 4.14083100 | -0.39602400 | 2.91675100  |
| H | 3.08148200 | -0.65220600 | 2.96410900  |
| H | 4.66819500 | -1.05861000 | 3.61447200  |
| H | 4.27791600 | 0.62522700  | 3.27717600  |
| C | 4.66727900 | -2.13299900 | 1.26009800  |
| H | 3.64321000 | -2.50520000 | 1.34092500  |
| H | 5.06537500 | -2.43010500 | 0.29029600  |
| H | 5.26673700 | -2.63522200 | 2.02992200  |
| C | 6.19952500 | -0.17366900 | 1.54108100  |
| H | 6.31259600 | 0.90045700  | 1.70005000  |
| H | 6.69501300 | -0.68287400 | 2.37762700  |
| H | 6.74201300 | -0.44632200 | 0.63422600  |
| C | 2.17292700 | 1.98342500  | 1.83202400  |
| H | 2.43883200 | 1.43448900  | 2.73408900  |
| H | 1.89897000 | 3.00172600  | 2.13286200  |
| H | 1.28529500 | 1.51933500  | 1.39392400  |
| C | 4.49611200 | 2.81086100  | 1.42102400  |
| H | 4.16925900 | 3.83053300  | 1.66248900  |
| H | 4.83491100 | 2.35431300  | 2.35363400  |
| H | 5.34991400 | 2.89185700  | 0.74596600  |
| C | 2.74992000 | 2.89011800  | -0.36656000 |
| H | 1.88005100 | 2.41375900  | -0.82836300 |
| H | 2.41248700 | 3.85211800  | 0.03589100  |
| H | 3.48799600 | 3.10742100  | -1.13993000 |
| C | 5.75604200 | 1.45201100  | -1.42937400 |
| H | 6.31123100 | 1.37302100  | -2.37303600 |
| H | 5.34447600 | 2.46158500  | -1.38464800 |
| H | 6.47478300 | 1.33618300  | -0.61597300 |
| C | 5.33228900 | -0.97804500 | -1.74124300 |
| H | 5.75269000 | -0.91159400 | -2.75256600 |
| H | 6.15257600 | -1.22961000 | -1.06758600 |
| H | 4.61537800 | -1.80315800 | -1.74909600 |
| C | 3.68987700 | 0.62725300  | -2.58204500 |
| H | 3.07893200 | 1.52010500  | -2.45812700 |
| H | 4.27443000 | 0.75219100  | -3.50257900 |
| H | 3.02243900 | -0.22347300 | -2.73435800 |
| C | 2.00548300 | -3.19495600 | -1.17592400 |
| H | 2.90352400 | -2.58246200 | -1.09585900 |
| H | 1.60273900 | -3.10827500 | -2.18713000 |
| H | 2.31240400 | -4.23901900 | -1.02803400 |



|    |             |             |             |
|----|-------------|-------------|-------------|
| H  | -0.68655900 | 0.13867700  | 0.58899800  |
| 7  |             |             |             |
| Ni | -0.98684200 | -0.64462600 | -0.05871700 |
| B  | 1.84342900  | -0.12599200 | 0.00053400  |
| C  | 2.17238100  | -0.03442800 | 1.58359100  |
| C  | 1.40688500  | -0.70802000 | 2.52753700  |
| C  | 3.21640200  | 0.71747500  | 2.11892400  |
| C  | 1.59938800  | -0.62518100 | 3.89924400  |
| C  | 3.45580100  | 0.83119800  | 3.48501100  |
| C  | 2.63474000  | 0.16323100  | 4.38551500  |
| C  | 2.27935900  | -1.53101900 | -0.68496100 |
| C  | 1.86622000  | -1.86212800 | -1.97720800 |
| C  | 3.02782900  | -2.52663300 | -0.05546300 |
| C  | 2.13982000  | -3.06811600 | -2.60402600 |
| C  | 3.32268500  | -3.75676400 | -0.64234300 |
| C  | 2.87372100  | -4.03406600 | -1.92510000 |
| C  | 2.22457700  | 1.22633400  | -0.80068400 |
| C  | 1.74593800  | 2.45199600  | -0.33186700 |
| C  | 3.00011100  | 1.31252000  | -1.95524900 |
| C  | 1.97602800  | 3.66807900  | -0.96091100 |
| C  | 3.23226000  | 2.50455400  | -2.63587000 |
| C  | 2.70993900  | 3.69148500  | -2.14096500 |
| F  | 3.14393200  | -5.20779500 | -2.50128500 |
| F  | 1.70198400  | -3.31306600 | -3.84606800 |
| F  | 1.14072900  | -0.98100800 | -2.69039600 |
| F  | 4.03830800  | -4.67163200 | 0.02256700  |
| F  | 3.52845200  | -2.35269700 | 1.18086900  |
| F  | 4.07398500  | 1.36937800  | 1.31278500  |
| F  | 4.46869100  | 1.57723100  | 3.94112700  |
| F  | 2.84558500  | 0.26653300  | 5.70055800  |
| F  | 0.80495100  | -1.29207000 | 4.74754200  |
| F  | 0.40406500  | -1.52147700 | 2.11624200  |
| F  | 3.60680000  | 0.22623100  | -2.47138400 |
| F  | 3.97228400  | 2.51870300  | -3.75225600 |
| F  | 2.93907700  | 4.84675500  | -2.77110400 |
| F  | 1.53380300  | 4.81561000  | -0.43460300 |
| F  | 1.06180600  | 2.49909800  | 0.82714000  |
| C  | -1.46060800 | 1.86809600  | -1.23722700 |
| C  | -1.59417800 | 1.11305800  | -0.12655300 |
| C  | -1.85862100 | 3.30389200  | -1.26691500 |
| C  | -1.50569300 | 4.19696800  | -0.24543600 |
| C  | -2.61958300 | 3.79345500  | -2.34060500 |
| C  | -1.90736300 | 5.52919800  | -0.28901900 |

|   |             |             |             |
|---|-------------|-------------|-------------|
| H | -0.90866000 | 3.84318000  | 0.58631700  |
| C | -3.03153900 | 5.12486600  | -2.38137500 |
| H | -2.91262800 | 3.12440000  | -3.14546900 |
| C | -2.67654800 | 6.00032100  | -1.35427300 |
| H | -1.61115700 | 6.20326600  | 0.51087700  |
| H | -3.62931900 | 5.47768400  | -3.21835200 |
| H | -2.99005600 | 7.04059600  | -1.38741900 |
| C | -2.13795900 | 1.56920400  | 1.16003600  |
| C | -3.40127400 | 2.17671300  | 1.25024300  |
| C | -1.40099600 | 1.39161500  | 2.34175800  |
| C | -3.91702000 | 2.57058300  | 2.48073800  |
| H | -3.96637000 | 2.35949600  | 0.34130100  |
| C | -1.91358800 | 1.78683000  | 3.57455800  |
| H | -0.40940800 | 0.95807500  | 2.28376200  |
| C | -3.17966900 | 2.37021000  | 3.65072200  |
| H | -4.89733400 | 3.03851200  | 2.52823400  |
| H | -1.32272100 | 1.63943800  | 4.47509800  |
| H | -3.58558200 | 2.67474800  | 4.61183600  |
| P | -2.87628500 | -1.82174300 | -0.22293000 |
| C | -3.64722300 | -2.30628800 | 1.45681600  |
| C | -1.94712100 | -3.32696000 | -0.93011800 |
| C | -4.26309500 | -1.30802600 | -1.41830300 |
| C | -2.61205400 | -3.03023500 | 2.33039000  |
| H | -1.69539500 | -2.44799400 | 2.44768300  |
| H | -3.04772300 | -3.15074200 | 3.33000500  |
| H | -2.36242200 | -4.03017400 | 1.97033800  |
| C | -4.01825500 | -1.03374500 | 2.23282000  |
| H | -3.13439800 | -0.43658200 | 2.45956800  |
| H | -4.73477900 | -0.39503800 | 1.72173400  |
| H | -4.46930700 | -1.34033600 | 3.18523700  |
| C | -4.88753700 | -3.20047800 | 1.32672500  |
| H | -4.70101000 | -4.11197300 | 0.75522900  |
| H | -5.19489100 | -3.50232900 | 2.33637600  |
| H | -5.73498400 | -2.67859900 | 0.87810200  |
| C | -0.60644400 | -3.34159000 | -0.17688600 |
| H | -0.68663000 | -3.57780700 | 0.88054200  |
| H | 0.06590300  | -4.07586700 | -0.63820200 |
| H | -0.05186900 | -2.38735300 | -0.26963500 |
| C | -2.62502200 | -4.69201400 | -0.79473100 |
| H | -1.97232600 | -5.44935700 | -1.24877500 |
| H | -2.78363900 | -4.98406800 | 0.24491600  |
| H | -3.58514800 | -4.73098400 | -1.31439200 |
| C | -1.60379000 | -3.09094500 | -2.40796300 |
| H | -1.09980900 | -2.13383000 | -2.56844300 |

|   |             |             |             |
|---|-------------|-------------|-------------|
| H | -0.91331000 | -3.88055000 | -2.72809400 |
| H | -2.47586100 | -3.13992700 | -3.06177700 |
| C | -5.25262800 | -0.36526200 | -0.71991000 |
| H | -5.92319700 | 0.04492200  | -1.48547000 |
| H | -5.87638200 | -0.86659600 | 0.02205100  |
| H | -4.74253600 | 0.47482900  | -0.24494500 |
| C | -3.65179800 | -0.49529400 | -2.56704900 |
| H | -4.45144800 | -0.25179600 | -3.27833600 |
| H | -3.23717100 | 0.43867600  | -2.18746200 |
| H | -2.87174300 | -1.02198000 | -3.11517200 |
| C | -5.03777400 | -2.50260900 | -1.99218700 |
| H | -5.47610400 | -3.13935200 | -1.22188900 |
| H | -5.86116500 | -2.11012000 | -2.60281300 |
| H | -4.42427100 | -3.12573300 | -2.64590800 |
| C | -0.88142000 | 1.32918000  | -2.51522700 |
| H | -0.68722900 | 0.26060700  | -2.43425800 |
| H | -1.54375700 | 1.49092600  | -3.37188900 |
| H | 0.06399800  | 1.83343100  | -2.74428800 |
| H | 0.54876800  | -0.05378800 | -0.06365500 |

**TS<sub>7/8</sub>**

|    |             |             |             |
|----|-------------|-------------|-------------|
| Ni | 0.90545300  | 0.22319600  | 0.14429800  |
| B  | -0.85154400 | -1.27102400 | -0.06871400 |
| C  | -2.19884300 | -0.83584700 | -0.83920900 |
| C  | -3.17179500 | -0.09171800 | -0.16669000 |
| C  | -2.58021000 | -1.24159500 | -2.12006300 |
| C  | -4.38017700 | 0.29787300  | -0.72626500 |
| C  | -3.77033000 | -0.85836400 | -2.72748400 |
| C  | -4.67538000 | -0.06851500 | -2.03133800 |
| C  | 0.36379200  | -1.86255800 | -0.92495900 |
| C  | 1.08732500  | -3.01312500 | -0.55037900 |
| C  | 0.66523000  | -1.40341800 | -2.22471100 |
| C  | 1.97036600  | -3.67710000 | -1.39313800 |
| C  | 1.53090100  | -2.04745800 | -3.09561400 |
| C  | 2.18573300  | -3.20047900 | -2.68036800 |
| C  | -1.22931900 | -2.03071700 | 1.30640800  |
| C  | -0.52882800 | -1.91728500 | 2.50239400  |
| C  | -2.33315600 | -2.88790400 | 1.37487200  |
| C  | -0.89771000 | -2.52723000 | 3.69256000  |
| C  | -2.74073000 | -3.52765600 | 2.54135500  |
| C  | -2.02559700 | -3.33769500 | 3.71651500  |
| F  | 3.04371300  | -3.81490700 | -3.48966400 |
| F  | 2.61290000  | -4.77219700 | -0.97660200 |
| F  | 0.91543900  | -3.58020800 | 0.65073900  |

|   |             |             |             |
|---|-------------|-------------|-------------|
| F | 1.75253300  | -1.56208700 | -4.32039700 |
| F | 0.05328800  | -0.31901100 | -2.71208100 |
| F | -1.82935300 | -2.10862400 | -2.82551100 |
| F | -4.06401700 | -1.26986500 | -3.96681900 |
| F | -5.81927600 | 0.31619300  | -2.60168900 |
| F | -5.24237600 | 1.05027700  | -0.03015700 |
| F | -2.96859300 | 0.28806300  | 1.11056100  |
| F | -3.05515000 | -3.17309500 | 0.27602800  |
| F | -3.81008700 | -4.33138300 | 2.53793800  |
| F | -2.40358500 | -3.93959200 | 4.84570100  |
| F | -0.17167400 | -2.35354900 | 4.80395900  |
| F | 0.61554400  | -1.20540900 | 2.54087500  |
| C | -0.40856100 | 1.71332300  | 0.30531100  |
| C | -0.74188200 | 2.31958500  | 1.47811100  |
| C | -1.28085700 | 3.69941300  | 1.52890400  |
| C | -2.35343000 | 4.00903600  | 2.37905000  |
| C | -0.71356400 | 4.73348300  | 0.76817800  |
| C | -2.86790700 | 5.30335100  | 2.43693900  |
| H | -2.80785400 | 3.22574700  | 2.97959200  |
| C | -1.21664600 | 6.02902800  | 0.83546800  |
| H | 0.12690800  | 4.51408800  | 0.11788000  |
| C | -2.30254200 | 6.31904600  | 1.66473500  |
| H | -3.71291500 | 5.51772900  | 3.08647400  |
| H | -0.76084300 | 6.81466500  | 0.23796700  |
| H | -2.70066800 | 7.32928100  | 1.71264700  |
| C | -0.86282000 | 2.27110600  | -0.99873900 |
| C | -0.00472000 | 2.40503100  | -2.09185000 |
| C | -2.19886400 | 2.67487100  | -1.16224300 |
| C | -0.44945900 | 2.91972200  | -3.30788700 |
| H | 1.02225400  | 2.08702600  | -1.98859300 |
| C | -2.65660700 | 3.17588200  | -2.37584500 |
| H | -2.87743000 | 2.61221300  | -0.31853500 |
| C | -1.78207300 | 3.30173900  | -3.45817600 |
| H | 0.24465300  | 3.00920200  | -4.13998900 |
| H | -3.69811600 | 3.47120400  | -2.47585200 |
| H | -2.13847100 | 3.69139800  | -4.40823400 |
| P | 3.15139800  | 0.89742600  | 0.35942100  |
| C | 4.13814200  | 0.63510400  | -1.26756500 |
| C | 3.97301500  | -0.20897200 | 1.69733300  |
| C | 3.41196500  | 2.72580600  | 0.88340900  |
| C | 4.32855900  | -0.87083000 | -1.47985700 |
| H | 3.40396500  | -1.41837400 | -1.29463600 |
| H | 4.61871700  | -1.04723600 | -2.52312000 |
| H | 5.11298700  | -1.29297400 | -0.84997700 |

|   |             |             |             |
|---|-------------|-------------|-------------|
| C | 3.29036000  | 1.12136000  | -2.45091600 |
| H | 2.33261900  | 0.60052700  | -2.49235500 |
| H | 3.09891900  | 2.19444300  | -2.43476400 |
| H | 3.82677900  | 0.89831300  | -3.38199200 |
| C | 5.51354000  | 1.30740600  | -1.35045100 |
| H | 6.17341200  | 1.02863300  | -0.52696400 |
| H | 5.99608400  | 0.98262600  | -2.28217600 |
| H | 5.44731300  | 2.39684900  | -1.38856700 |
| C | 3.50292900  | -1.66036100 | 1.50543900  |
| H | 3.93766700  | -2.14255800 | 0.63147900  |
| H | 3.80691200  | -2.24433300 | 2.38351600  |
| H | 2.41815400  | -1.72630700 | 1.43486200  |
| C | 5.50682400  | -0.20538800 | 1.73029900  |
| H | 5.82999900  | -0.81415900 | 2.58551100  |
| H | 5.94779000  | -0.65310000 | 0.83746800  |
| H | 5.93142400  | 0.79083800  | 1.86018000  |
| C | 3.46575200  | 0.23707100  | 3.07777700  |
| H | 2.37975600  | 0.35265900  | 3.10613800  |
| H | 3.73380400  | -0.53373600 | 3.81102400  |
| H | 3.92836600  | 1.16933000  | 3.40758300  |
| C | 4.81610600  | 3.07906800  | 1.38971300  |
| H | 4.85809600  | 4.16635800  | 1.53913500  |
| H | 5.02981100  | 2.61821800  | 2.35693400  |
| H | 5.61384100  | 2.81313700  | 0.69609000  |
| C | 3.07117600  | 3.62940800  | -0.31082700 |
| H | 3.04150200  | 4.66815300  | 0.04191500  |
| H | 3.81221200  | 3.58311900  | -1.11086600 |
| H | 2.08641400  | 3.39858100  | -0.72575000 |
| C | 2.40998900  | 3.09824000  | 1.98372500  |
| H | 2.55748800  | 2.55389300  | 2.91453200  |
| H | 2.52426000  | 4.16725000  | 2.20551700  |
| H | 1.38996300  | 2.93537200  | 1.64615300  |
| C | -0.57820200 | 1.64647100  | 2.80796900  |
| H | -0.18999100 | 2.34516600  | 3.55534400  |
| H | 0.10027500  | 0.80129300  | 2.73334100  |
| H | -1.54247500 | 1.27602500  | 3.17650000  |
| H | -0.62223900 | 0.41297500  | 0.37925600  |

**8**

|    |             |             |             |
|----|-------------|-------------|-------------|
| Ni | -1.49208800 | -0.82043800 | -0.15415800 |
| B  | -1.53997000 | 1.54835000  | -0.49704600 |
| C  | -0.14386300 | 2.15106100  | -0.89969200 |
| C  | 0.80024700  | 2.50052800  | 0.06917400  |
| C  | 0.16584700  | 2.54152800  | -2.20502600 |

|   |             |             |             |
|---|-------------|-------------|-------------|
| C | 1.97669700  | 3.17666400  | -0.21834200 |
| C | 1.34158400  | 3.20324500  | -2.53594700 |
| C | 2.25343300  | 3.52126900  | -1.53668200 |
| C | -2.32052300 | 0.52861900  | -1.31574600 |
| C | -3.74863600 | 0.36976000  | -1.27419300 |
| C | -1.61460500 | -0.49904600 | -2.06802800 |
| C | -4.41622000 | -0.58594600 | -1.98443900 |
| C | -2.34478400 | -1.40683800 | -2.90390100 |
| C | -3.70168200 | -1.48548900 | -2.82011700 |
| C | -2.21734800 | 2.24080100  | 0.75872200  |
| C | -2.66239000 | 1.51784300  | 1.85399200  |
| C | -2.38054500 | 3.62173500  | 0.84663700  |
| C | -3.23349400 | 2.08662800  | 2.98099800  |
| C | -2.95509100 | 4.24261500  | 1.95060600  |
| C | -3.38120500 | 3.46961900  | 3.02630700  |
| F | -4.39073000 | -2.38528700 | -3.52764800 |
| F | -5.75183900 | -0.68231100 | -1.94585000 |
| F | -4.48835000 | 1.24565500  | -0.57414500 |
| F | -1.66986900 | -2.17535000 | -3.76817800 |
| F | -0.36821000 | -0.23386500 | -2.57247600 |
| F | -0.70900600 | 2.33537000  | -3.19979600 |
| F | 1.59587300  | 3.55354000  | -3.80054000 |
| F | 3.37922800  | 4.16581700  | -1.83673400 |
| F | 2.84397700  | 3.49525300  | 0.74729100  |
| F | 0.58766900  | 2.16846200  | 1.35929800  |
| F | -1.99783000 | 4.40896500  | -0.17245300 |
| F | -3.10288000 | 5.56988000  | 1.99017900  |
| F | -3.92571000 | 4.05028900  | 4.09605300  |
| F | -3.63088900 | 1.33283000  | 4.01153700  |
| F | -2.52544000 | 0.16708300  | 1.84628600  |
| C | 3.44742300  | 0.37373400  | 0.89587100  |
| C | 4.35002800  | 0.02923400  | 1.83485200  |
| C | 5.68258100  | -0.53078600 | 1.50480500  |
| C | 6.85200100  | -0.03604600 | 2.09835500  |
| C | 5.78891600  | -1.60516000 | 0.60827100  |
| C | 8.09714000  | -0.57843800 | 1.77999600  |
| H | 6.79190700  | 0.79544600  | 2.79623000  |
| C | 7.02978300  | -2.15358500 | 0.29590000  |
| H | 4.88584400  | -2.00212200 | 0.15269700  |
| C | 8.19090300  | -1.63829800 | 0.87698200  |
| H | 8.99530500  | -0.17149900 | 2.23793500  |
| H | 7.09191100  | -2.98480600 | -0.40220600 |
| H | 9.16076200  | -2.06299900 | 0.63104200  |
| C | 3.63262400  | 0.43139600  | -0.56086700 |

|   |             |             |             |
|---|-------------|-------------|-------------|
| C | 2.58112200  | 0.05527700  | -1.41072200 |
| C | 4.81370400  | 0.92271200  | -1.14087900 |
| C | 2.71509100  | 0.13275700  | -2.79486800 |
| H | 1.64138900  | -0.28655400 | -0.98540200 |
| C | 4.94449500  | 1.01240200  | -2.52354200 |
| H | 5.62384700  | 1.25285700  | -0.49787900 |
| C | 3.89852100  | 0.61128300  | -3.35784100 |
| H | 1.88853200  | -0.16510700 | -3.43234000 |
| H | 5.86157100  | 1.40910500  | -2.95187600 |
| H | 3.99819900  | 0.68783000  | -4.43742400 |
| P | -0.90301800 | -2.85988400 | 0.67263600  |
| C | -2.49357700 | -3.60010500 | 1.44593700  |
| C | 0.41683500  | -2.68545500 | 2.03898500  |
| C | -0.24862800 | -4.07391400 | -0.64687800 |
| C | -2.83261800 | -2.88616800 | 2.76394100  |
| H | -2.91469500 | -1.80597800 | 2.64182000  |
| H | -3.81236600 | -3.24907900 | 3.10017600  |
| H | -2.12166000 | -3.09538500 | 3.56445700  |
| C | -3.66326900 | -3.29141100 | 0.49373000  |
| H | -3.76642100 | -2.21222700 | 0.33470600  |
| H | -3.57158700 | -3.76936300 | -0.48112700 |
| H | -4.59403500 | -3.65054400 | 0.95177300  |
| C | -2.44351800 | -5.10679100 | 1.72744800  |
| H | -1.62323800 | -5.37925300 | 2.39541200  |
| H | -3.38015100 | -5.39880700 | 2.22054800  |
| H | -2.36073300 | -5.70652800 | 0.81946500  |
| C | 0.12592200  | -1.37599900 | 2.79219600  |
| H | -0.85318300 | -1.35312000 | 3.27028000  |
| H | 0.88352300  | -1.24576900 | 3.57570500  |
| H | 0.19975600  | -0.51367900 | 2.11972900  |
| C | 0.49917100  | -3.85238600 | 3.02998900  |
| H | 1.33381600  | -3.66293100 | 3.71804600  |
| H | -0.40001000 | -3.96158200 | 3.63868900  |
| H | 0.69417000  | -4.80589500 | 2.53393700  |
| C | 1.80078800  | -2.50311100 | 1.40589100  |
| H | 1.80577400  | -1.71806500 | 0.64846400  |
| H | 2.49964800  | -2.19284900 | 2.19060400  |
| H | 2.19646000  | -3.41941300 | 0.96522500  |
| C | 0.43242600  | -5.33292800 | -0.09556500 |
| H | 0.70535300  | -5.97538900 | -0.94323500 |
| H | 1.35319600  | -5.11007300 | 0.44647200  |
| H | -0.21878700 | -5.91436800 | 0.55991800  |
| C | -1.41169500 | -4.51361800 | -1.54711200 |
| H | -0.99738400 | -5.02739000 | -2.42298700 |

|   |             |             |             |
|---|-------------|-------------|-------------|
| H | -2.09122400 | -5.20981000 | -1.05275400 |
| H | -1.99092000 | -3.66510900 | -1.91188500 |
| C | 0.74493600  | -3.31887500 | -1.54652000 |
| H | 1.66918000  | -3.04948700 | -1.03696400 |
| H | 1.01278800  | -3.96895000 | -2.38926900 |
| H | 0.31003000  | -2.40683300 | -1.95656700 |
| C | 4.00835200  | 0.12995100  | 3.29596600  |
| H | 2.98572400  | 0.48859500  | 3.43906200  |
| H | 4.11828400  | -0.84206900 | 3.79256600  |
| H | 4.68259900  | 0.82290100  | 3.81332800  |
| H | 2.45518200  | 0.64646600  | 1.24844100  |

**2<sup>eye</sup>**

|    |             |             |             |
|----|-------------|-------------|-------------|
| Ni | 0.82688900  | -0.87461000 | 0.31043100  |
| B  | 0.75933500  | 1.37782300  | 0.78869000  |
| C  | -0.68301300 | 1.99042900  | 0.59691400  |
| C  | -1.19427900 | 2.32206100  | -0.65838300 |
| C  | -1.46311000 | 2.39037400  | 1.68518500  |
| C  | -2.39760300 | 2.98826800  | -0.84221100 |
| C  | -2.66928600 | 3.06444800  | 1.54400700  |
| C  | -3.14098700 | 3.36262000  | 0.27059500  |
| C  | 1.06897700  | 0.31284000  | 1.84745000  |
| C  | 2.35071100  | 0.09203400  | 2.44986300  |
| C  | 0.07768600  | -0.72195300 | 2.09165900  |
| C  | 2.63402900  | -0.99498100 | 3.22737600  |
| C  | 0.37444600  | -1.80813300 | 2.97364700  |
| C  | 1.63108300  | -1.96719500 | 3.48080600  |
| C  | 1.92380600  | 2.10085000  | -0.01327900 |
| C  | 2.97294900  | 1.41297400  | -0.61844400 |
| C  | 1.95443900  | 3.48711300  | -0.19035600 |
| C  | 3.96967900  | 2.01622400  | -1.36867900 |
| C  | 2.94020800  | 4.13931100  | -0.92310600 |
| C  | 3.95195700  | 3.39848100  | -1.52332900 |
| F  | 1.93991700  | -3.02065100 | 4.24087400  |
| F  | 3.83636000  | -1.16005500 | 3.79396000  |
| F  | 3.30974000  | 1.02029600  | 2.30499300  |
| F  | -0.59672900 | -2.67680300 | 3.28356900  |
| F  | -1.25971300 | -0.42909400 | 2.04761200  |
| F  | -1.03475700 | 2.17815400  | 2.93811700  |
| F  | -3.38258800 | 3.42695100  | 2.61542600  |
| F  | -4.30514000 | 3.99431200  | 0.11720500  |
| F  | -2.84463100 | 3.27518800  | -2.07047400 |
| F  | -0.50036400 | 2.01488600  | -1.76969200 |
| F  | 1.01992800  | 4.26597100  | 0.37818000  |



|   |             |             |             |
|---|-------------|-------------|-------------|
| F | 2.92518500  | 5.46861000  | -1.05512700 |
| F | 4.89876300  | 4.00648600  | -2.23677400 |
| F | 4.93602200  | 1.28977200  | -1.93954700 |
| F | 3.04805700  | 0.06713300  | -0.49606400 |
| P | 0.48405700  | -2.53221900 | -1.18558800 |
| C | -0.96026900 | -3.68323600 | -0.70806500 |
| C | 2.07995800  | -3.58030700 | -1.30431600 |
| C | 0.12395300  | -1.72791400 | -2.87306600 |
| C | -0.53648300 | -4.57853600 | 0.46545700  |
| H | -0.13820800 | -3.99479300 | 1.29819900  |
| H | -1.42840300 | -5.10047700 | 0.83407300  |
| H | 0.19267700  | -5.34136100 | 0.18896900  |
| C | -2.11598000 | -2.82178800 | -0.17820500 |
| H | -1.80610300 | -2.19834100 | 0.66150500  |
| H | -2.55395700 | -2.17414400 | -0.93496500 |
| H | -2.90800400 | -3.49324100 | 0.17670300  |
| C | -1.48384200 | -4.56463800 | -1.84795100 |
| H | -0.70762100 | -5.18472500 | -2.30059100 |
| H | -2.25070600 | -5.23760300 | -1.44213700 |
| H | -1.95918100 | -3.97709600 | -2.63690700 |
| C | 2.62057200  | -3.75921300 | 0.12708900  |
| H | 1.93890000  | -4.28961100 | 0.79118400  |
| H | 3.55384900  | -4.33559900 | 0.08090300  |
| H | 2.85232400  | -2.79013600 | 0.58409000  |
| C | 1.90749800  | -4.94775400 | -1.97680000 |
| H | 2.89099800  | -5.43203400 | -2.03894900 |
| H | 1.25417900  | -5.62088000 | -1.41935500 |
| H | 1.52089900  | -4.86020000 | -2.99554600 |
| C | 3.17398800  | -2.82178900 | -2.07056200 |
| H | 3.35740600  | -1.82807900 | -1.65922500 |
| H | 4.10730700  | -3.39139200 | -1.97467300 |
| H | 2.96285100  | -2.73107800 | -3.13787600 |
| C | 0.26799600  | -2.64538900 | -4.09133300 |
| H | -0.01467100 | -2.08093700 | -4.98992000 |
| H | 1.29475700  | -2.98867700 | -4.23681500 |
| H | -0.38035000 | -3.52229200 | -4.03665800 |
| C | -1.29758900 | -1.14784300 | -2.84485200 |
| H | -1.42118000 | -0.48818200 | -3.71257700 |
| H | -2.06889300 | -1.91768800 | -2.91074400 |
| H | -1.47435900 | -0.54555900 | -1.94850900 |
| C | 1.07003200  | -0.52422100 | -3.02237500 |
| H | 2.12118700  | -0.80007200 | -3.08820200 |
| H | 0.80840100  | 0.01489700  | -3.94196600 |
| H | 0.94631600  | 0.17619700  | -2.19141500 |

|   |             |             |             |
|---|-------------|-------------|-------------|
| C | -4.27158300 | 0.10056300  | 0.07186000  |
| C | -5.06064900 | -0.94384800 | 0.86159000  |
| C | -6.56360000 | -0.80012700 | 0.61158600  |
| C | -6.88652100 | -0.86786900 | -0.88319500 |
| C | -6.09074300 | 0.17342400  | -1.67397600 |
| C | -4.58909100 | 0.02779700  | -1.42178200 |
| H | -3.19607600 | -0.01277900 | 0.24675200  |
| H | -4.54767900 | 1.09576700  | 0.44387700  |
| H | -4.83858300 | -0.85677200 | 1.93184400  |
| H | -4.74029700 | -1.94874200 | 0.55480900  |
| H | -6.90327100 | 0.16736000  | 1.00903900  |
| H | -7.11695400 | -1.57497100 | 1.15610300  |
| H | -7.96221800 | -0.73043600 | -1.04738400 |
| H | -6.63645200 | -1.87112800 | -1.25897100 |
| H | -6.40952500 | 1.18030500  | -1.36800800 |
| H | -6.30829700 | 0.08706900  | -2.74557200 |
| H | -4.25551800 | -0.94296800 | -1.81569300 |
| H | -4.03247800 | 0.79476800  | -1.97230000 |

**TS<sub>2/3</sub><sup>cyc</sup>**

|    |             |             |             |
|----|-------------|-------------|-------------|
| Ni | 0.91421700  | -0.15528000 | -0.64198200 |
| B  | -1.08773100 | -0.00640600 | 0.25750700  |
| C  | -2.59807800 | -0.44721500 | -0.12944900 |
| C  | -3.32532700 | 0.32274000  | -1.04482000 |
| C  | -3.35028300 | -1.45153600 | 0.48712900  |
| C  | -4.65581500 | 0.09966100  | -1.37332100 |
| C  | -4.68253700 | -1.71603900 | 0.18118400  |
| C  | -5.34219300 | -0.94225600 | -0.76301300 |
| C  | -0.33201300 | -0.90702200 | 1.38049600  |
| C  | 0.17253200  | -0.44526200 | 2.60681000  |
| C  | -0.17260200 | -2.29257800 | 1.19382400  |
| C  | 0.75341400  | -1.27379400 | 3.56429700  |
| C  | 0.41213800  | -3.14650600 | 2.11440400  |
| C  | 0.87833100  | -2.63309000 | 3.32013900  |
| C  | -1.12913100 | 1.59830800  | 0.55209800  |
| C  | -0.55102900 | 2.62038100  | -0.19176700 |
| C  | -1.92429600 | 2.03590400  | 1.61426000  |
| C  | -0.69474700 | 3.97104200  | 0.10875400  |
| C  | -2.10066800 | 3.37042000  | 1.95199600  |
| C  | -1.47050100 | 4.35179600  | 1.19441300  |
| F  | 1.45813400  | -3.43207800 | 4.21492000  |
| F  | 1.20928300  | -0.76142000 | 4.71296800  |
| F  | 0.09892200  | 0.84670300  | 2.96015700  |

|   |             |             |             |
|---|-------------|-------------|-------------|
| F | 0.53104300  | -4.45353000 | 1.85660800  |
| F | -0.64302400 | -2.86944100 | 0.07849900  |
| F | -2.83674200 | -2.21013200 | 1.47118300  |
| F | -5.33824000 | -2.70023300 | 0.80738000  |
| F | -6.61817500 | -1.18457400 | -1.06856500 |
| F | -5.27350200 | 0.86758400  | -2.27852000 |
| F | -2.73595200 | 1.35608200  | -1.67654400 |
| F | -2.56460600 | 1.13180200  | 2.37935300  |
| F | -2.86044900 | 3.72131100  | 2.99622100  |
| F | -1.61900700 | 5.64288100  | 1.50129600  |
| F | -0.09982300 | 4.90331800  | -0.64786600 |
| F | 0.17794300  | 2.34782500  | -1.29613300 |
| P | 3.21217100  | 0.15029700  | -0.64558500 |
| C | 3.95165200  | 0.46444900  | -2.38636100 |
| C | 4.01725100  | -1.42549600 | 0.07479600  |
| C | 3.67136400  | 1.64127300  | 0.46046300  |
| C | 3.92209800  | -0.83715300 | -3.20594300 |
| H | 2.93417300  | -1.30359200 | -3.24023200 |
| H | 4.20365200  | -0.59706900 | -4.23886000 |
| H | 4.63711100  | -1.57715400 | -2.84181000 |
| C | 3.07904600  | 1.49405000  | -3.13163100 |
| H | 2.01211100  | 1.26712500  | -3.08581300 |
| H | 3.21275100  | 2.50731000  | -2.75577100 |
| H | 3.37392800  | 1.49682700  | -4.18873800 |
| C | 5.39809400  | 0.97797200  | -2.38756400 |
| H | 6.08787700  | 0.30496400  | -1.87513100 |
| H | 5.73371100  | 1.06363300  | -3.42981500 |
| H | 5.48977300  | 1.96948900  | -1.94044100 |
| C | 3.28406800  | -2.63456000 | -0.53043500 |
| H | 3.38891500  | -2.71869900 | -1.61172600 |
| H | 3.68738000  | -3.55243200 | -0.08337800 |
| H | 2.21606100  | -2.59085400 | -0.29652200 |
| C | 5.52639300  | -1.58194000 | -0.13643400 |
| H | 5.86301400  | -2.47847200 | 0.40100700  |
| H | 5.79000200  | -1.72128700 | -1.18715100 |
| H | 6.09526500  | -0.73403800 | 0.25121200  |
| C | 3.71930500  | -1.48299200 | 1.57809400  |
| H | 2.65664600  | -1.32479300 | 1.77312300  |
| H | 3.97653400  | -2.48365400 | 1.94744400  |
| H | 4.29313800  | -0.76272700 | 2.16367500  |
| C | 5.11652400  | 1.66214100  | 0.97136700  |
| H | 5.27090000  | 2.59121500  | 1.53608100  |
| H | 5.33600600  | 0.83516500  | 1.64955700  |
| H | 5.84993500  | 1.64462400  | 0.16255700  |

|   |             |             |             |
|---|-------------|-------------|-------------|
| C | 3.39892000  | 2.95621000  | -0.28590700 |
| H | 3.43971200  | 3.77466100  | 0.44404800  |
| H | 4.14568000  | 3.17439100  | -1.05153500 |
| H | 2.40708800  | 2.97213300  | -0.74288600 |
| C | 2.70617700  | 1.64177300  | 1.65392800  |
| H | 2.77888100  | 0.75152300  | 2.27674000  |
| H | 2.92765400  | 2.50772700  | 2.29107800  |
| H | 1.66935300  | 1.74296200  | 1.31969300  |
| C | 0.28686500  | -0.76730200 | -2.53219200 |
| C | 0.22852300  | -2.28330500 | -2.69662500 |
| C | -1.17672800 | -2.82836400 | -2.93189100 |
| C | -1.80840700 | -2.15210600 | -4.14572700 |
| C | -1.91403700 | -0.65089300 | -3.89458700 |
| C | -0.56379500 | -0.01507700 | -3.55970100 |
| H | 1.31369400  | -0.44400800 | -2.69646500 |
| H | -0.49316200 | -0.41334100 | -1.24419600 |
| H | 0.70956300  | -2.78715300 | -1.85772700 |
| H | 0.83734100  | -2.52420000 | -3.58461500 |
| H | -1.80058900 | -2.64128200 | -2.04940200 |
| H | -1.13106600 | -3.91526500 | -3.06557100 |
| H | -2.80218500 | -2.56836800 | -4.34771100 |
| H | -1.19354500 | -2.34728200 | -5.03661900 |
| H | -2.61299200 | -0.50572200 | -3.07018400 |
| H | -2.34529700 | -0.13543600 | -4.76052100 |
| H | 0.03525300  | 0.00316400  | -4.48449800 |
| H | -0.69154800 | 1.02866400  | -3.26230200 |

**3<sup>eye</sup>**

|    |             |             |             |
|----|-------------|-------------|-------------|
| Ni | 1.15349400  | 0.58712100  | 0.14624500  |
| B  | -1.23401400 | -0.21718600 | 0.00781200  |
| C  | -2.55079900 | 0.53670000  | -0.60026300 |
| C  | -3.04090500 | 1.66767400  | 0.05414300  |
| C  | -3.31412500 | 0.13613400  | -1.69668200 |
| C  | -4.15082900 | 2.39269900  | -0.35993000 |
| C  | -4.43366300 | 0.82943200  | -2.14881400 |
| C  | -4.85284100 | 1.97292800  | -1.48258300 |
| C  | -0.55930800 | -1.29691000 | -1.01125400 |
| C  | -0.32560200 | -2.64461000 | -0.72482800 |
| C  | -0.29046400 | -0.94318600 | -2.33957100 |
| C  | 0.11582500  | -3.56894200 | -1.66891400 |
| C  | 0.14221800  | -1.83031300 | -3.31316000 |
| C  | 0.34634400  | -3.16298400 | -2.97542900 |
| C  | -1.64524700 | -0.79530700 | 1.46912000  |
| C  | -1.07730100 | -0.40700200 | 2.67627500  |

|   |             |             |             |
|---|-------------|-------------|-------------|
| C | -2.70692800 | -1.69212600 | 1.58592500  |
| C | -1.50326800 | -0.87653300 | 3.91518100  |
| C | -3.17061900 | -2.18634300 | 2.79720900  |
| C | -2.55987000 | -1.77420500 | 3.97738300  |
| F | 0.78926300  | -4.03122400 | -3.88648500 |
| F | 0.33314900  | -4.84293700 | -1.32084400 |
| F | -0.51815100 | -3.14092600 | 0.51006000  |
| F | 0.37961800  | -1.41546300 | -4.56315100 |
| F | -0.48998200 | 0.32254900  | -2.74319300 |
| F | -3.01582100 | -0.98227500 | -2.38395700 |
| F | -5.11539100 | 0.39698700  | -3.21713700 |
| F | -5.92423100 | 2.64990600  | -1.90468200 |
| F | -4.55188800 | 3.47899500  | 0.31338600  |
| F | -2.43676000 | 2.10452300  | 1.17798300  |
| F | -3.32224900 | -2.13726000 | 0.47429300  |
| F | -4.18789300 | -3.05516500 | 2.84358800  |
| F | -2.98575900 | -2.23769500 | 5.15598800  |
| F | -0.90591600 | -0.46753600 | 5.04327000  |
| F | -0.04943400 | 0.47006900  | 2.70486700  |
| P | 3.34938800  | 0.26385500  | 0.23907400  |
| C | 3.88100700  | -0.43870000 | -1.45010600 |
| C | 3.40935700  | -1.10680600 | 1.56485100  |
| C | 4.58545200  | 1.64367200  | 0.72020800  |
| C | 3.16750200  | -1.77425300 | -1.68173800 |
| H | 2.09726300  | -1.68684400 | -1.49211700 |
| H | 3.29436200  | -2.05684200 | -2.73378900 |
| H | 3.57002200  | -2.58839000 | -1.07621800 |
| C | 3.34060500  | 0.52293400  | -2.52337900 |
| H | 2.25251900  | 0.61388400  | -2.45123200 |
| H | 3.76665900  | 1.52473400  | -2.46783300 |
| H | 3.57909500  | 0.11391400  | -3.51334500 |
| C | 5.38388700  | -0.66623000 | -1.64558100 |
| H | 5.80215000  | -1.34186700 | -0.89517900 |
| H | 5.53427900  | -1.13386200 | -2.62736900 |
| H | 5.96458100  | 0.25748500  | -1.63905600 |
| C | 2.12667500  | -1.93272000 | 1.37630200  |
| H | 2.12048700  | -2.52268400 | 0.46288800  |
| H | 2.01259700  | -2.62554000 | 2.21895000  |
| H | 1.22715400  | -1.29792100 | 1.38874400  |
| C | 4.62015600  | -2.04319500 | 1.52412700  |
| H | 4.51456100  | -2.78128400 | 2.33023300  |
| H | 4.68885100  | -2.59916600 | 0.58685000  |
| H | 5.56451700  | -1.51894500 | 1.68094900  |
| C | 3.30023700  | -0.47805300 | 2.96213600  |

|   |             |             |             |
|---|-------------|-------------|-------------|
| H | 2.44069000  | 0.19415000  | 3.03935500  |
| H | 3.14707300  | -1.28736000 | 3.68707700  |
| H | 4.20170400  | 0.05792900  | 3.26364300  |
| C | 5.91980900  | 1.06998300  | 1.22281800  |
| H | 6.61834000  | 1.90476800  | 1.36401300  |
| H | 5.82077700  | 0.57042700  | 2.18831100  |
| H | 6.37922200  | 0.37400000  | 0.51925800  |
| C | 4.89106100  | 2.57612300  | -0.46487700 |
| H | 5.50103000  | 3.40495400  | -0.08382900 |
| H | 5.46369800  | 2.09353400  | -1.25782200 |
| H | 3.99128500  | 3.01500800  | -0.90320500 |
| C | 3.99187700  | 2.53686200  | 1.82266300  |
| H | 3.60789100  | 1.98590200  | 2.67955000  |
| H | 4.78691900  | 3.20110900  | 2.18506700  |
| H | 3.19139700  | 3.16822100  | 1.43833400  |
| C | 1.16099200  | 2.46846800  | -0.12855900 |
| C | 0.35702500  | 2.85900800  | -1.35707700 |
| C | 0.36240600  | 4.39020200  | -1.51324100 |
| C | -0.16044300 | 5.07844100  | -0.25364100 |
| C | 0.64010500  | 4.65473900  | 0.97717800  |
| C | 0.62726500  | 3.12436900  | 1.13572300  |
| H | -0.47057100 | 0.77331500  | 0.20823500  |
| H | 0.76718000  | 2.39665400  | -2.25884200 |
| H | -0.67934000 | 2.51538500  | -1.26591600 |
| H | -0.23997200 | 4.66960000  | -2.38628600 |
| H | 1.38901400  | 4.72881600  | -1.71405200 |
| H | -1.21519400 | 4.80773500  | -0.10624900 |
| H | -0.12757600 | 6.16814300  | -0.37395200 |
| H | 0.23444000  | 5.12086600  | 1.88332600  |
| H | 1.67746600  | 5.00606000  | 0.87545600  |
| H | -0.39950200 | 2.80190900  | 1.31489900  |
| H | 1.20451100  | 2.82946000  | 2.01665400  |
| H | 2.19931400  | 2.76683400  | -0.29110300 |

### Cyclohexane

|   |             |             |             |
|---|-------------|-------------|-------------|
| C | -1.43705700 | 0.25265500  | 0.23076400  |
| C | -0.49965000 | 1.37089700  | -0.23101100 |
| C | 0.93736100  | 1.11813100  | 0.23125700  |
| C | 1.43703800  | -0.25264700 | -0.23116800 |
| C | 0.49974900  | -1.37082400 | 0.23117200  |
| C | -0.93729900 | -1.11823300 | -0.23107700 |
| H | 1.60110000  | 1.91014000  | -0.13671900 |
| H | -0.51929800 | 1.42541800  | -1.32936300 |
| H | -0.85375200 | 2.34145100  | 0.13758800  |

|   |             |             |             |
|---|-------------|-------------|-------------|
| H | -1.49441700 | 0.26271700  | 1.32911400  |
| H | -2.45461800 | 0.43154100  | -0.13787800 |
| H | 1.49333600  | -0.26251300 | -1.32958600 |
| H | 2.45487900  | -0.43158800 | 0.13655700  |
| H | 0.85363800  | -2.34171300 | -0.13676500 |
| H | 0.51950600  | -1.42463400 | 1.32957500  |
| H | -0.97442500 | -1.16288200 | -1.32942100 |
| H | -1.60110400 | -1.90984600 | 0.13761600  |
| H | 0.97430400  | 1.16203700  | 1.32965700  |

**PhC≡CPh**

|   |             |             |             |
|---|-------------|-------------|-------------|
| C | -0.60885100 | -0.00001000 | -0.00016800 |
| C | 0.60887200  | -0.00000100 | -0.00014200 |
| C | -2.03090000 | 0.00004800  | -0.00012200 |
| C | -2.74469700 | -1.21350400 | 0.00007200  |
| C | -2.74477500 | 1.21357300  | -0.00010400 |
| C | -4.13631200 | -1.20849800 | 0.00017000  |
| H | -2.19629300 | -2.15102800 | 0.00010700  |
| C | -4.13638100 | 1.20844900  | -0.00001800 |
| H | -2.19645500 | 2.15112200  | -0.00022900 |
| C | -4.83697800 | -0.00004300 | 0.00012400  |
| H | -4.67677100 | -2.15146300 | 0.00029300  |
| H | -4.67693400 | 2.15136100  | -0.00005900 |
| H | -5.92371000 | -0.00003700 | 0.00019300  |
| C | 2.03092400  | -0.00000300 | -0.00010600 |
| C | 2.74474200  | 1.21353500  | 0.00003800  |
| C | 2.74472200  | -1.21355300 | -0.00014600 |
| C | 4.13635300  | 1.20848000  | 0.00017300  |
| H | 2.19638300  | 2.15107500  | 0.00005700  |
| C | 4.13632300  | -1.20847400 | -0.00001200 |
| H | 2.19634500  | -2.15106700 | -0.00027400 |
| C | 4.83696100  | 0.00000600  | 0.00014300  |
| H | 4.67686700  | 2.15141400  | 0.00030400  |
| H | 4.67684700  | -2.15140000 | -0.00003700 |
| H | 5.92369200  | -0.00001000 | 0.00023100  |

**cis-1,2-diphenylpropene**

|   |             |             |             |
|---|-------------|-------------|-------------|
| H | 1.04265500  | 2.76563600  | -0.00150600 |
| C | 0.60061600  | 1.76987200  | 0.03892600  |
| C | -0.74628000 | 1.69785000  | 0.00547000  |
| C | -1.49054500 | 0.41649500  | -0.08725100 |
| C | -2.51044800 | 0.10206300  | 0.82133600  |
| C | -1.20353900 | -0.49425700 | -1.11483100 |
| C | -3.20445200 | -1.10420000 | 0.72449400  |

|   |             |             |             |
|---|-------------|-------------|-------------|
| H | -2.74801700 | 0.79481000  | 1.62500500  |
| C | -1.90158600 | -1.69471900 | -1.21865800 |
| H | -0.42060400 | -0.25396400 | -1.82891000 |
| C | -2.90170500 | -2.00762300 | -0.29510400 |
| H | -3.98229100 | -1.33806600 | 1.44724100  |
| H | -1.66456100 | -2.38828100 | -2.02165800 |
| H | -3.44447200 | -2.94616200 | -0.37312000 |
| C | 1.57300500  | 0.66971700  | 0.12006500  |
| C | 2.81847000  | 0.81589100  | -0.51321200 |
| C | 1.33261500  | -0.51124300 | 0.84340500  |
| C | 3.77609400  | -0.19566100 | -0.46249400 |
| H | 3.02946500  | 1.73242800  | -1.06066000 |
| C | 2.29060600  | -1.51978200 | 0.89991600  |
| H | 0.39164900  | -0.63395600 | 1.37006900  |
| C | 3.51392000  | -1.37213200 | 0.24115400  |
| H | 4.72861100  | -0.06333700 | -0.96978900 |
| H | 2.08398300  | -2.42405000 | 1.46722700  |
| H | 4.25946500  | -2.16187000 | 0.28622000  |
| C | -1.58534500 | 2.94676200  | 0.00398800  |
| H | -2.25183500 | 2.97466200  | 0.87450200  |
| H | -0.96397700 | 3.84605100  | 0.02559300  |
| H | -2.22862400 | 2.98191100  | -0.88343000 |
