# Supplementary material for: Rational design of nickel–borane complexes for methane activation and functionalization
Source: Royal Society of Chemistry journal article supplement (doi:10.1039/d2me00007e), 2022-01-01
Supplement: d2me00007e2.pdf [file d2me00007e2.pdf]

## **Rational Design on Methane Activation and Functionalization by Nickel-Borane Complex**

Linlin Yang,<sup>a</sup> Kangqiao Fan,<sup>a</sup> Lei Zhang,<sup>\*b</sup> Guixiang Zeng<sup>\*a</sup>

<sup>a</sup> Kuang Yaming Honors School, Institute for Brain Sciences, Nanjing University, Nanjing 210023, China. E-mail: gxzeng@nju.edu.cn

<sup>b</sup> Institute of Theoretical and Computational Chemistry, School of Chemistry and Chemical Engineering, Nanjing University, Nanjing 210023, China. E-mail: fly\_zhanglei@163.com

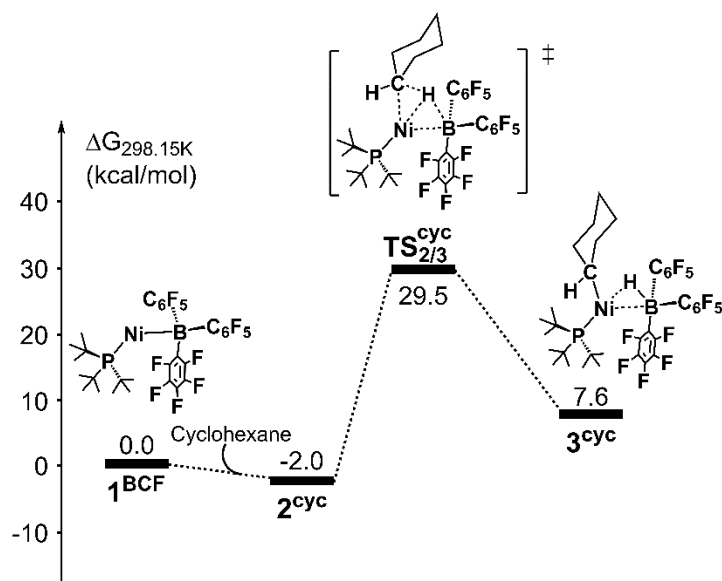

**Figure S1.** Gibbs energy profiles of the C-H  $\sigma$ -bond activation of Cyclohexane by **1<sup>BCF</sup>**.

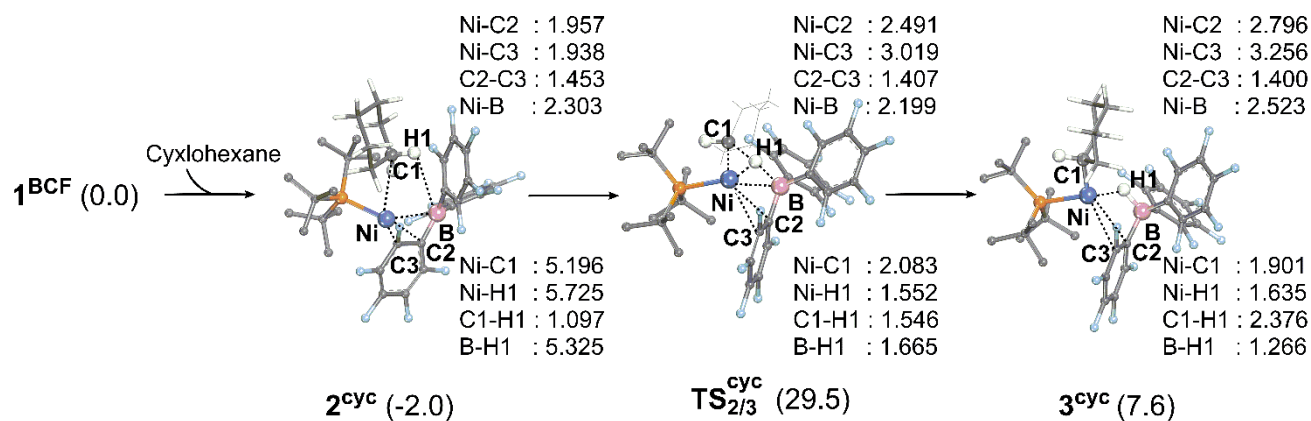

**Figure S2.** Optimized geometries of all species involved in the C-H  $\sigma$ -bond activation of Cyclohexane by **1<sup>BCF</sup>**. Distances are in Å. The Gibbs energy changes are given in parentheses (kcal/mol).

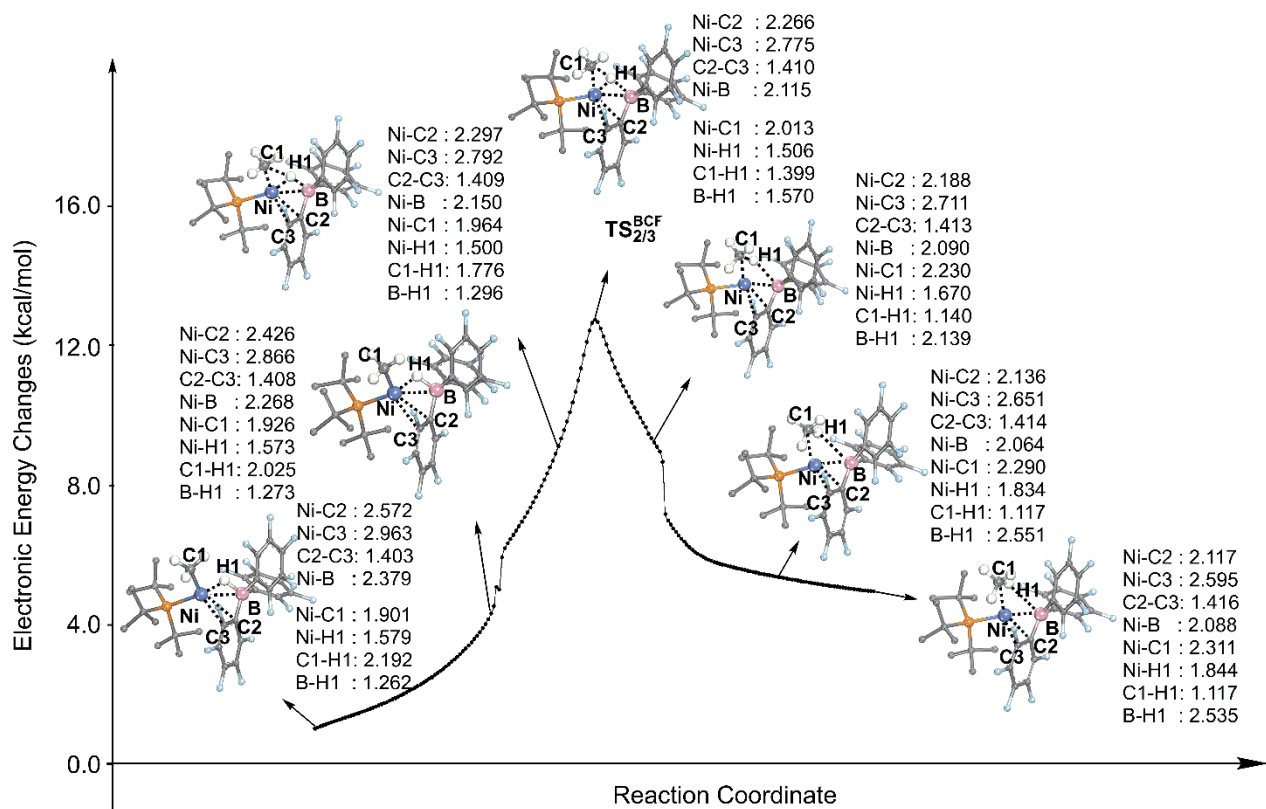

**Figure S3.** The intrinsic reaction coordinate of **TS<sub>2/3</sub><sup>BCF</sup>**.

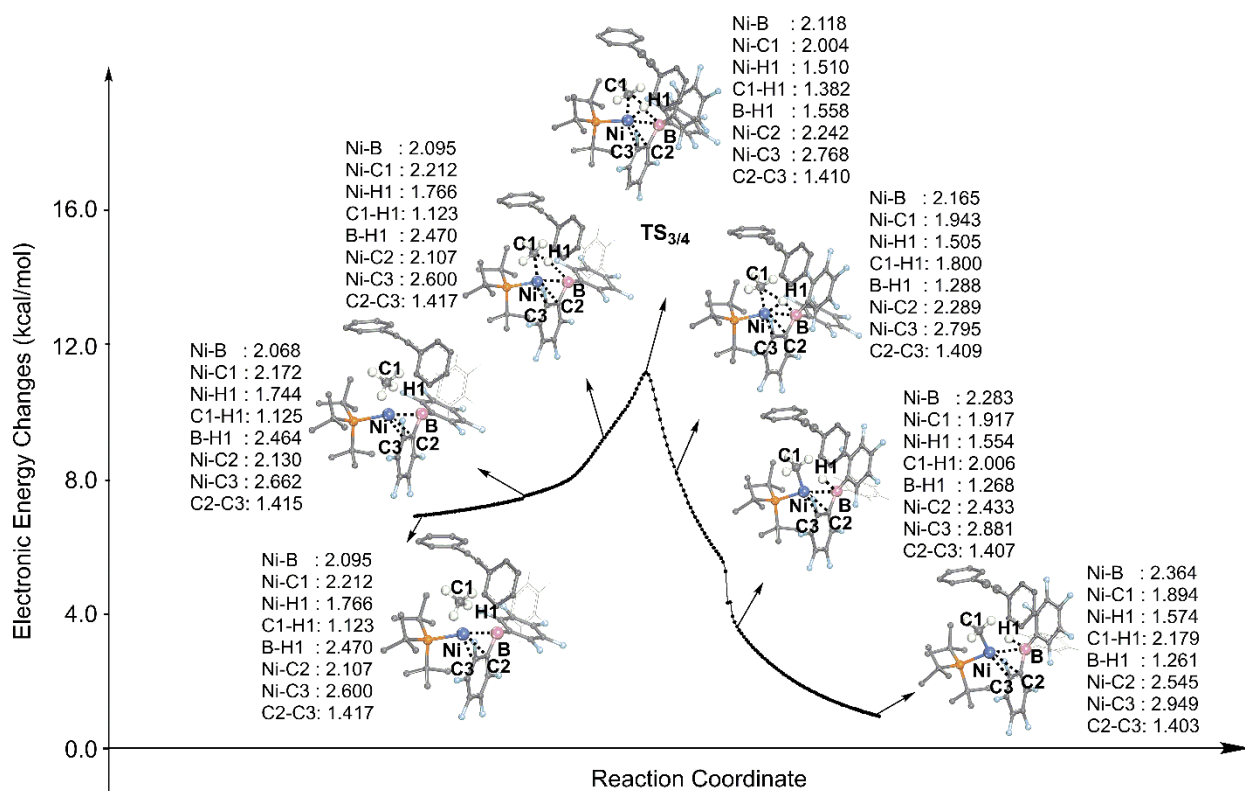

**Figure S4.** The intrinsic reaction coordinate of **TS<sub>3/4</sub>**.

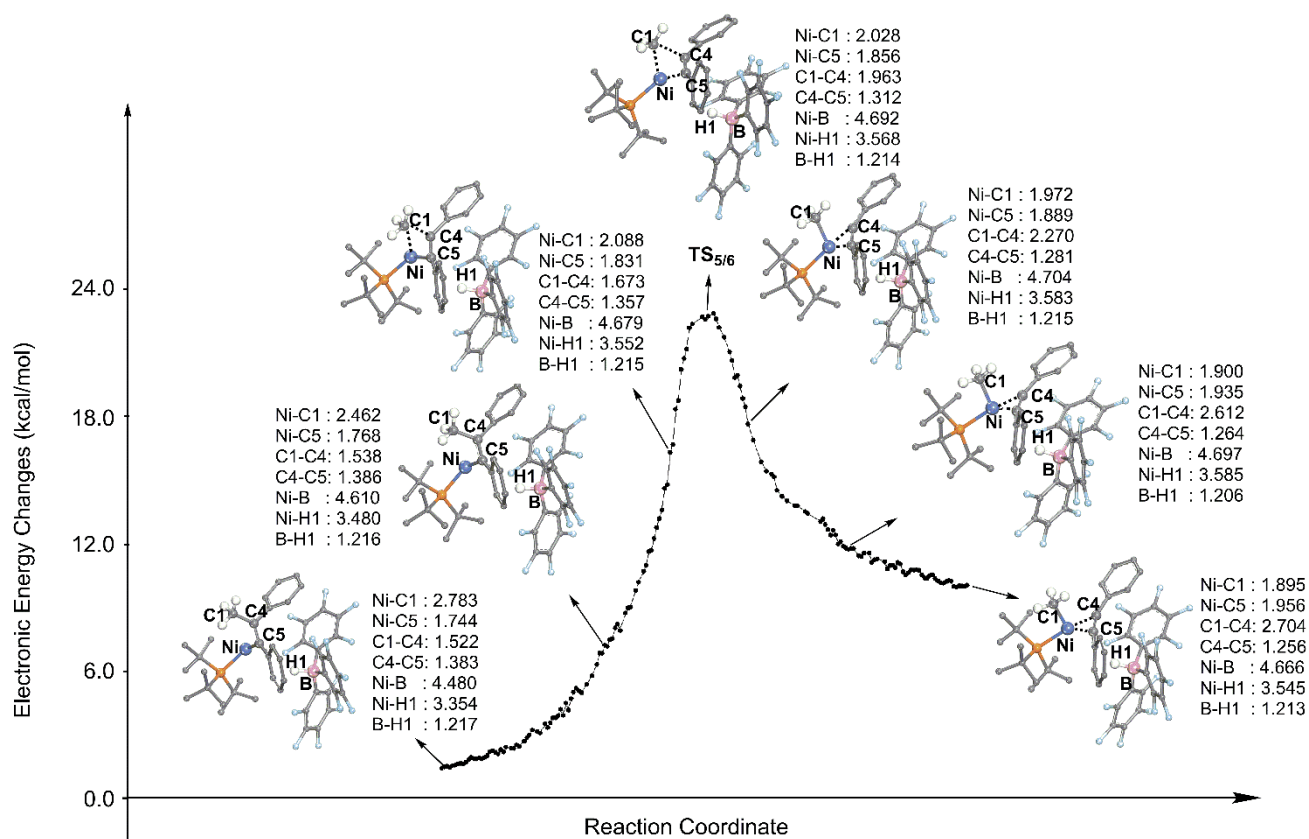

Figure S5. The intrinsic reaction coordinate of TS<sub>5/6</sub>.

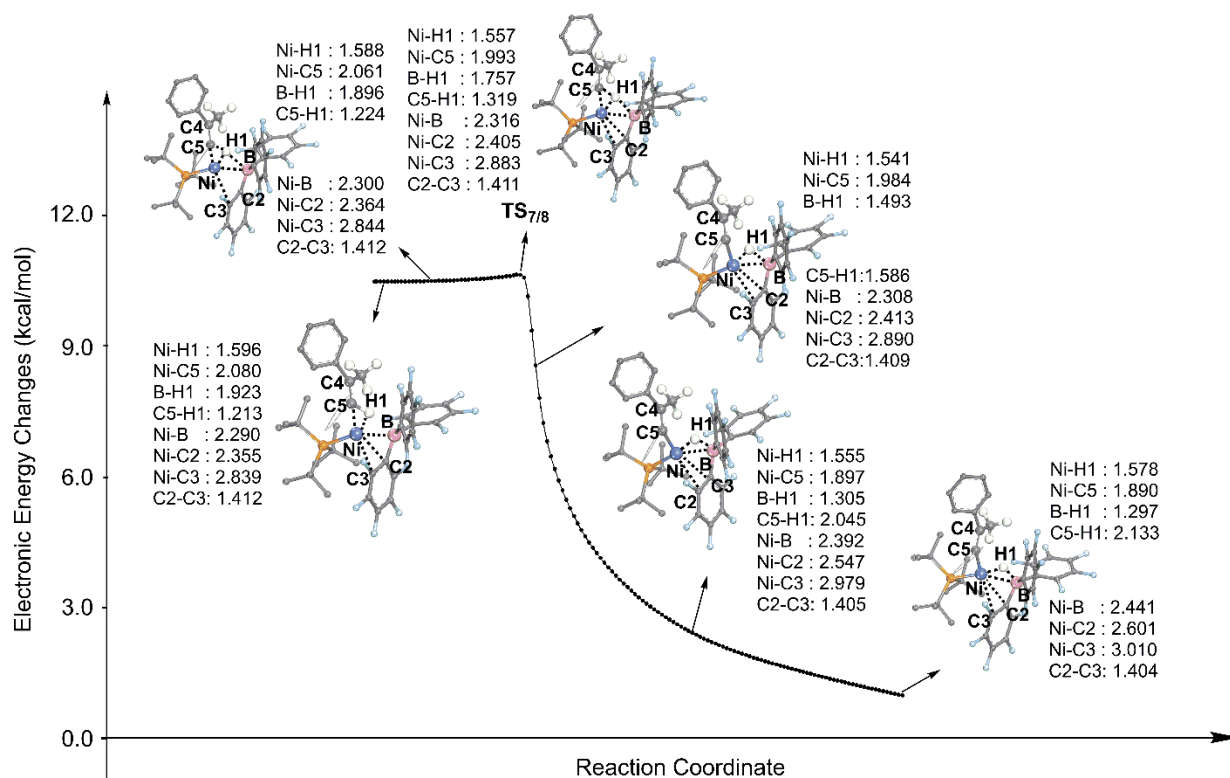

Figure S6. The intrinsic reaction coordinate of TS<sub>7/8</sub>.
